# Supplementary material for: Column experiment reveals high natural attenuation potential for toluene in iron-rich aquifers but significant concomitant secondary Fe pollution risk
Source: Front Microbiol. 2025 Oct 22;16:1687219. doi: 10.3389/fmicb.2025.1687219 (PMC12587300; doi:10.3389/fmicb.2025.1687219)
Supplement: Supplementary Table 2 — Abundance of identified iron-reducing microorganisms. [file Table_2.xlsx]

## Sheet: tax_g (5)
#Taxonomy							T1_10	T1_20	T1_50	T1_90	T2_10	T2_20	T2_50	T2_90	Total
d__Archaea	k__unclassified_d__Archaea	p__Candidatus_Bathyarchaeota	c__unclassified_p__Candidatus_Bathyarchaeota	o__unclassified_p__Candidatus_Bathyarchaeota	f__unclassified_p__Candidatus_Bathyarchaeota	g__unclassified_p__Candidatus_Bathyarchaeota	0	0	0	0	0	2	0	0	2
d__Archaea	k__unclassified_d__Archaea	p__Candidatus_Thermoplasmatota	c__Thermoplasmata	o__Methanomassiliicoccales	f__unclassified_o__Methanomassiliicoccales	g__unclassified_o__Methanomassiliicoccales	0	0	0	0	10	50	74	42	176
d__Archaea	k__unclassified_d__Archaea	p__Candidatus_Thermoplasmatota	c__unclassified_p__Candidatus_Thermoplasmatota	o__unclassified_p__Candidatus_Thermoplasmatota	f__unclassified_p__Candidatus_Thermoplasmatota	g__unclassified_p__Candidatus_Thermoplasmatota	0	0	0	0	0	0	0	8	8
d__Archaea	k__unclassified_d__Archaea	p__Euryarchaeota	c__Methanomicrobia	o__Methanosarcinales	f__Methanosarcinaceae	g__Methanolobus	2	6	10	2	10	40	32	10	112
d__Archaea	k__unclassified_d__Archaea	p__Euryarchaeota	c__Methanomicrobia	o__Methanosarcinales	f__Methanosarcinaceae	g__Methanomethylovorans	0	8	42	20	110	1390	1584	664	3818
d__Archaea	k__unclassified_d__Archaea	p__Euryarchaeota	c__Methanomicrobia	o__Methanosarcinales	f__Methanosarcinaceae	g__Methanosarcina	0	0	0	0	0	4	2	46	52
d__Archaea	k__unclassified_d__Archaea	p__Euryarchaeota	c__unclassified_p__Euryarchaeota	o__unclassified_p__Euryarchaeota	f__unclassified_p__Euryarchaeota	g__unclassified_p__Euryarchaeota	0	0	2	192	6	24	82	62	368
d__Bacteria	k__unclassified_d__Bacteria	p__Acidobacteriota	c__Blastocatellia	o__Blastocatellales	f__Pyrinomonadaceae	g__Pyrinomonas	12	0	0	0	42	0	0	0	54
d__Bacteria	k__unclassified_d__Bacteria	p__Acidobacteriota	c__Holophagae	o__Holophagales	f__Holophagaceae	g__Geothrix	0	10	0	0	918	4	2	0	934
d__Bacteria	k__unclassified_d__Bacteria	p__Acidobacteriota	c__Terriglobia	o__Bryobacterales	f__Solibacteraceae	g__Candidatus_Solibacter	28	0	148	118	58	32	24	68	476
d__Bacteria	k__unclassified_d__Bacteria	p__Acidobacteriota	c__Terriglobia	o__Bryobacterales	f__Solibacteraceae	g__Candidatus_Sulfopaludibacter	0	0	0	0	0	0	0	2	2
d__Bacteria	k__unclassified_d__Bacteria	p__Acidobacteriota	c__Terriglobia	o__Terriglobales	f__Acidobacteriaceae	g__Edaphobacter	0	0	0	0	0	0	4	4	8
d__Bacteria	k__unclassified_d__Bacteria	p__Acidobacteriota	c__Terriglobia	o__Terriglobales	f__Acidobacteriaceae	g__Granulicella	0	0	2	0	0	0	0	0	2
d__Bacteria	k__unclassified_d__Bacteria	p__Acidobacteriota	c__Vicinamibacteria	o__Vicinamibacterales	f__Vicinamibacteraceae	g__Luteitalea	0	6	162	86	0	0	0	0	254
d__Bacteria	k__unclassified_d__Bacteria	p__Actinomycetota	c__Acidimicrobiia	o__Acidimicrobiales	f__Acidimicrobiaceae	g__Acidiferrimicrobium	0	0	10	36	0	0	0	0	46
d__Bacteria	k__unclassified_d__Bacteria	p__Actinomycetota	c__Acidimicrobiia	o__Acidimicrobiales	f__Iamiaceae	g__Actinomarinicola	0	4	0	6	0	0	0	0	10
d__Bacteria	k__unclassified_d__Bacteria	p__Actinomycetota	c__Acidimicrobiia	o__Acidimicrobiales	f__Iamiaceae	g__Iamia	0	32	232	202	0	2	0	16	484
d__Bacteria	k__unclassified_d__Bacteria	p__Actinomycetota	c__Acidimicrobiia	o__Acidimicrobiales	f__Iamiaceae	g__Rhabdothermincola	2	8	34	36	0	0	0	0	80
d__Bacteria	k__unclassified_d__Bacteria	p__Actinomycetota	c__Acidimicrobiia	o__Acidimicrobiales	f__Ilumatobacteraceae	g__Desertimonas	0	28	204	226	0	2	4	38	502
d__Bacteria	k__unclassified_d__Bacteria	p__Actinomycetota	c__Acidimicrobiia	o__Acidimicrobiales	f__Ilumatobacteraceae	g__Ilumatobacter	0	0	0	24	0	0	0	0	24
d__Bacteria	k__unclassified_d__Bacteria	p__Actinomycetota	c__Actinomycetes	o__Actinomycetales	f__Actinomycetaceae	g__Ancrocorticia	2	4	0	0	0	0	0	0	6
d__Bacteria	k__unclassified_d__Bacteria	p__Actinomycetota	c__Actinomycetes	o__Catenulisporales	f__Actinospicaceae	g__Actinospica	0	0	4	4	0	0	0	0	8
d__Bacteria	k__unclassified_d__Bacteria	p__Actinomycetota	c__Actinomycetes	o__Frankiales	f__Frankiaceae	g__Parafrankia	10	10	40	26	0	0	4	0	90
d__Bacteria	k__unclassified_d__Bacteria	p__Actinomycetota	c__Actinomycetes	o__Geodermatophilales	f__Geodermatophilaceae	g__Blastococcus	30	26	190	114	30	36	38	26	490
d__Bacteria	k__unclassified_d__Bacteria	p__Actinomycetota	c__Actinomycetes	o__Geodermatophilales	f__Geodermatophilaceae	g__Geodermatophilus	0	0	0	6	0	0	0	0	6
d__Bacteria	k__unclassified_d__Bacteria	p__Actinomycetota	c__Actinomycetes	o__Geodermatophilales	f__Geodermatophilaceae	g__Klenkia	8	4	0	0	0	0	0	0	12
d__Bacteria	k__unclassified_d__Bacteria	p__Actinomycetota	c__Actinomycetes	o__Geodermatophilales	f__Geodermatophilaceae	g__Modestobacter	8	10	2	0	0	0	0	0	20
d__Bacteria	k__unclassified_d__Bacteria	p__Actinomycetota	c__Actinomycetes	o__Glycomycetales	f__Glycomycetaceae	g__Glycomyces	0	2	4	2	0	0	0	0	8
d__Bacteria	k__unclassified_d__Bacteria	p__Actinomycetota	c__Actinomycetes	o__Jiangellales	f__Jiangellaceae	g__Jiangella	8	10	2	12	0	0	0	0	32
d__Bacteria	k__unclassified_d__Bacteria	p__Actinomycetota	c__Actinomycetes	o__Kineosporiales	f__Kineosporiaceae	g__Kineosporia	4	12	0	0	0	0	0	0	16
d__Bacteria	k__unclassified_d__Bacteria	p__Actinomycetota	c__Actinomycetes	o__Kitasatosporales	f__Streptomycetaceae	g__Embleya	0	0	0	6	0	0	0	0	6
d__Bacteria	k__unclassified_d__Bacteria	p__Actinomycetota	c__Actinomycetes	o__Kitasatosporales	f__Streptomycetaceae	g__Streptomyces	16	6	76	34	0	2	0	2	136
d__Bacteria	k__unclassified_d__Bacteria	p__Actinomycetota	c__Actinomycetes	o__Kitasatosporales	f__Streptomycetaceae	g__Wenjunlia	4	28	0	0	0	0	0	0	32
d__Bacteria	k__unclassified_d__Bacteria	p__Actinomycetota	c__Actinomycetes	o__Kitasatosporales	f__Streptomycetaceae	g__Yinghuangia	0	4	12	10	0	0	0	0	26
d__Bacteria	k__unclassified_d__Bacteria	p__Actinomycetota	c__Actinomycetes	o__Micrococcales	f__Beutenbergiaceae	g__Salana	6	2	0	0	0	0	0	0	8
d__Bacteria	k__unclassified_d__Bacteria	p__Actinomycetota	c__Actinomycetes	o__Micrococcales	f__Bogoriellaceae	g__Georgenia	0	18	108	28	0	2	0	0	156
d__Bacteria	k__unclassified_d__Bacteria	p__Actinomycetota	c__Actinomycetes	o__Micrococcales	f__Brevibacteriaceae	g__Brevibacterium	0	6	0	0	0	0	0	0	6
d__Bacteria	k__unclassified_d__Bacteria	p__Actinomycetota	c__Actinomycetes	o__Micrococcales	f__Cellulomonadaceae	g__Actinotalea	6	2	80	24	8	8	10	4	142
d__Bacteria	k__unclassified_d__Bacteria	p__Actinomycetota	c__Actinomycetes	o__Micrococcales	f__Cellulomonadaceae	g__Cellulomonas	2	28	110	56	0	0	0	0	196
d__Bacteria	k__unclassified_d__Bacteria	p__Actinomycetota	c__Actinomycetes	o__Micrococcales	f__Dermacoccaceae	g__Calidifontibacter	6	2	0	0	0	0	0	0	8
d__Bacteria	k__unclassified_d__Bacteria	p__Actinomycetota	c__Actinomycetes	o__Micrococcales	f__Dermatophilaceae	g__Agilicoccus	30	10	0	0	0	0	0	0	40
d__Bacteria	k__unclassified_d__Bacteria	p__Actinomycetota	c__Actinomycetes	o__Micrococcales	f__Dermatophilaceae	g__Austwickia	178	450	0	0	0	0	0	0	628
d__Bacteria	k__unclassified_d__Bacteria	p__Actinomycetota	c__Actinomycetes	o__Micrococcales	f__Intrasporangiaceae	g__Arsenicicoccus	32	90	0	0	0	0	0	0	122
d__Bacteria	k__unclassified_d__Bacteria	p__Actinomycetota	c__Actinomycetes	o__Micrococcales	f__Intrasporangiaceae	g__Intrasporangium	18	24	0	0	0	0	0	0	42
d__Bacteria	k__unclassified_d__Bacteria	p__Actinomycetota	c__Actinomycetes	o__Micrococcales	f__Intrasporangiaceae	g__Ornithinicoccus	6	14	104	44	0	0	2	0	170
d__Bacteria	k__unclassified_d__Bacteria	p__Actinomycetota	c__Actinomycetes	o__Micrococcales	f__Intrasporangiaceae	g__Phycicoccus	56	138	0	0	0	0	0	0	194
d__Bacteria	k__unclassified_d__Bacteria	p__Actinomycetota	c__Actinomycetes	o__Micrococcales	f__Intrasporangiaceae	g__Terrabacter	2	94	32	16	10	24	26	32	236
d__Bacteria	k__unclassified_d__Bacteria	p__Actinomycetota	c__Actinomycetes	o__Micrococcales	f__Intrasporangiaceae	g__Tetrasphaera	134	114	2	0	0	0	0	0	250
d__Bacteria	k__unclassified_d__Bacteria	p__Actinomycetota	c__Actinomycetes	o__Micrococcales	f__Microbacteriaceae	g__Agrococcus	0	0	6	0	0	0	0	0	6
d__Bacteria	k__unclassified_d__Bacteria	p__Actinomycetota	c__Actinomycetes	o__Micrococcales	f__Microbacteriaceae	g__Agromyces	10	22	8	0	28	64	34	38	204
d__Bacteria	k__unclassified_d__Bacteria	p__Actinomycetota	c__Actinomycetes	o__Micrococcales	f__Microbacteriaceae	g__Cryobacterium	6	12	0	0	0	0	0	0	18
d__Bacteria	k__unclassified_d__Bacteria	p__Actinomycetota	c__Actinomycetes	o__Micrococcales	f__Microbacteriaceae	g__Gulosibacter	2	12	2	0	0	0	0	0	16
d__Bacteria	k__unclassified_d__Bacteria	p__Actinomycetota	c__Actinomycetes	o__Micrococcales	f__Microbacteriaceae	g__Leifsonia	2	0	10	2	2	6	0	4	26
d__Bacteria	k__unclassified_d__Bacteria	p__Actinomycetota	c__Actinomycetes	o__Micrococcales	f__Microbacteriaceae	g__Leucobacter	10	4	20	10	124	198	148	72	586
d__Bacteria	k__unclassified_d__Bacteria	p__Actinomycetota	c__Actinomycetes	o__Micrococcales	f__Microbacteriaceae	g__Microbacterium	526	96	154	86	38	32	18	20	970
d__Bacteria	k__unclassified_d__Bacteria	p__Actinomycetota	c__Actinomycetes	o__Micrococcales	f__Micrococcaceae	g__Arthrobacter	200	248	1428	1286	68	78	68	136	3512
d__Bacteria	k__unclassified_d__Bacteria	p__Actinomycetota	c__Actinomycetes	o__Micrococcales	f__Micrococcaceae	g__Kocuria	0	4	84	42	0	2	6	18	156
d__Bacteria	k__unclassified_d__Bacteria	p__Actinomycetota	c__Actinomycetes	o__Micrococcales	f__Micrococcaceae	g__Paenarthrobacter	0	0	18	4	0	0	0	0	22
d__Bacteria	k__unclassified_d__Bacteria	p__Actinomycetota	c__Actinomycetes	o__Micrococcales	f__Micrococcaceae	g__Pseudarthrobacter	226	462	2484	2490	90	116	114	190	6172
d__Bacteria	k__unclassified_d__Bacteria	p__Actinomycetota	c__Actinomycetes	o__Micrococcales	f__Micrococcaceae	g__Sinomonas	0	0	26	24	0	0	0	0	50
d__Bacteria	k__unclassified_d__Bacteria	p__Actinomycetota	c__Actinomycetes	o__Micrococcales	f__Promicromonosporaceae	g__Promicromonospora	2	2	42	6	0	4	6	8	70
d__Bacteria	k__unclassified_d__Bacteria	p__Actinomycetota	c__Actinomycetes	o__Micromonosporales	f__Micromonosporaceae	g__Actinoplanes	4	12	0	6	0	0	0	0	22
d__Bacteria	k__unclassified_d__Bacteria	p__Actinomycetota	c__Actinomycetes	o__Micromonosporales	f__Micromonosporaceae	g__Dactylosporangium	20	30	0	0	0	0	0	0	50
d__Bacteria	k__unclassified_d__Bacteria	p__Actinomycetota	c__Actinomycetes	o__Micromonosporales	f__Micromonosporaceae	g__Phytohabitans	0	4	2	10	0	0	0	0	16
d__Bacteria	k__unclassified_d__Bacteria	p__Actinomycetota	c__Actinomycetes	o__Mycobacteriales	f__Corynebacteriaceae	g__Corynebacterium	6	8	0	0	0	0	0	0	14
d__Bacteria	k__unclassified_d__Bacteria	p__Actinomycetota	c__Actinomycetes	o__Mycobacteriales	f__Gordoniaceae	g__Gordonia	0	12	0	0	0	0	0	0	12
d__Bacteria	k__unclassified_d__Bacteria	p__Actinomycetota	c__Actinomycetes	o__Mycobacteriales	f__Mycobacteriaceae	g__Mycobacterium	74	148	550	482	28	44	64	170	1560
d__Bacteria	k__unclassified_d__Bacteria	p__Actinomycetota	c__Actinomycetes	o__Mycobacteriales	f__Mycobacteriaceae	g__Mycobacteroides	0	0	0	0	16	0	0	0	16
d__Bacteria	k__unclassified_d__Bacteria	p__Actinomycetota	c__Actinomycetes	o__Mycobacteriales	f__Mycobacteriaceae	g__Mycolicibacterium	24	50	230	186	2	16	42	138	688
d__Bacteria	k__unclassified_d__Bacteria	p__Actinomycetota	c__Actinomycetes	o__Mycobacteriales	f__Nocardiaceae	g__Antrihabitans	0	0	0	2	0	2	2	0	6
d__Bacteria	k__unclassified_d__Bacteria	p__Actinomycetota	c__Actinomycetes	o__Mycobacteriales	f__Nocardiaceae	g__Rhodococcus	90	284	422	968	222	54	60	58	2158
d__Bacteria	k__unclassified_d__Bacteria	p__Actinomycetota	c__Actinomycetes	o__Propionibacteriales	f__Actinopolymorphaceae	g__Actinopolymorpha	10	2	28	20	0	0	0	0	60
d__Bacteria	k__unclassified_d__Bacteria	p__Actinomycetota	c__Actinomycetes	o__Propionibacteriales	f__Nocardioidaceae	g__Aeromicrobium	0	4	6	12	8	42	68	36	176
d__Bacteria	k__unclassified_d__Bacteria	p__Actinomycetota	c__Actinomycetes	o__Propionibacteriales	f__Nocardioidaceae	g__Marmoricola	4	26	104	74	0	0	2	4	214
d__Bacteria	k__unclassified_d__Bacteria	p__Actinomycetota	c__Actinomycetes	o__Propionibacteriales	f__Nocardioidaceae	g__Micropruina	580	1566	22	2	14	32	16	46	2278
d__Bacteria	k__unclassified_d__Bacteria	p__Actinomycetota	c__Actinomycetes	o__Propionibacteriales	f__Nocardioidaceae	g__Nocardioides	88	1054	1672	1148	62	246	278	566	5114
d__Bacteria	k__unclassified_d__Bacteria	p__Actinomycetota	c__Actinomycetes	o__Propionibacteriales	f__Nocardioidaceae	g__Pimelobacter	112	82	224	144	4	8	10	18	602
d__Bacteria	k__unclassified_d__Bacteria	p__Actinomycetota	c__Actinomycetes	o__Propionibacteriales	f__Nocardioidaceae	g__Propionicimonas	6	28	2	0	8	20	22	36	122
d__Bacteria	k__unclassified_d__Bacteria	p__Actinomycetota	c__Actinomycetes	o__Propionibacteriales	f__Propionibacteriaceae	g__Granulicoccus	8	10	0	0	0	0	0	0	18
d__Bacteria	k__unclassified_d__Bacteria	p__Actinomycetota	c__Actinomycetes	o__Propionibacteriales	f__Propionibacteriaceae	g__Naumannella	52	104	4	0	28	18	18	72	296
d__Bacteria	k__unclassified_d__Bacteria	p__Actinomycetota	c__Actinomycetes	o__Propionibacteriales	f__Propionibacteriaceae	g__Nigerium	2	8	0	0	0	0	0	0	10
d__Bacteria	k__unclassified_d__Bacteria	p__Actinomycetota	c__Actinomycetes	o__Propionibacteriales	f__Propionibacteriaceae	g__Propionibacterium	296	406	2	0	4	16	16	14	754
d__Bacteria	k__unclassified_d__Bacteria	p__Actinomycetota	c__Actinomycetes	o__Propionibacteriales	f__Propionibacteriaceae	g__Propioniciclava	44	80	0	0	0	0	0	0	124
d__Bacteria	k__unclassified_d__Bacteria	p__Actinomycetota	c__Actinomycetes	o__Propionibacteriales	f__Propionibacteriaceae	g__Tessaracoccus	124	220	2	0	0	0	0	0	346
d__Bacteria	k__unclassified_d__Bacteria	p__Actinomycetota	c__Actinomycetes	o__Pseudonocardiales	f__Pseudonocardiaceae	g__Amycolatopsis	0	4	12	18	4	2	4	4	48
d__Bacteria	k__unclassified_d__Bacteria	p__Actinomycetota	c__Actinomycetes	o__Pseudonocardiales	f__Pseudonocardiaceae	g__Gandjariella	4	18	20	4	0	0	2	0	48
d__Bacteria	k__unclassified_d__Bacteria	p__Actinomycetota	c__Actinomycetes	o__Pseudonocardiales	f__Pseudonocardiaceae	g__Haloechinothrix	0	0	4	0	0	0	0	0	4
d__Bacteria	k__unclassified_d__Bacteria	p__Actinomycetota	c__Actinomycetes	o__Pseudonocardiales	f__Pseudonocardiaceae	g__Pseudonocardia	0	8	50	30	0	0	0	0	88
d__Bacteria	k__unclassified_d__Bacteria	p__Actinomycetota	c__Actinomycetes	o__Streptosporangiales	f__Nocardiopsaceae	g__Actinorugispora	0	0	6	4	0	0	0	0	10
d__Bacteria	k__unclassified_d__Bacteria	p__Actinomycetota	c__Actinomycetes	o__Streptosporangiales	f__Nocardiopsaceae	g__Streptomonospora	0	0	0	4	0	0	0	0	4
d__Bacteria	k__unclassified_d__Bacteria	p__Actinomycetota	c__Actinomycetes	o__Streptosporangiales	f__Streptosporangiaceae	g__Microbispora	0	0	0	2	0	0	0	0	2
d__Bacteria	k__unclassified_d__Bacteria	p__Actinomycetota	c__Actinomycetes	o__Streptosporangiales	f__Streptosporangiaceae	g__Planotetraspora	0	0	6	2	0	0	0	0	8
d__Bacteria	k__unclassified_d__Bacteria	p__Actinomycetota	c__Coriobacteriia	o__Anaerosomatales	f__Anaerosomataceae	g__Anaerosoma	0	0	12	2	10	68	88	32	212
d__Bacteria	k__unclassified_d__Bacteria	p__Actinomycetota	c__Coriobacteriia	o__Anaerosomatales	f__Anaerosomataceae	g__Parvivirga	0	0	0	0	2	6	6	42	56
d__Bacteria	k__unclassified_d__Bacteria	p__Actinomycetota	c__Rubrobacteria	o__Gaiellales	f__Gaiellaceae	g__Gaiella	0	2	6	0	4	22	14	16	64
d__Bacteria	k__unclassified_d__Bacteria	p__Actinomycetota	c__Rubrobacteria	o__Rubrobacterales	f__Rubrobacteraceae	g__Rubrobacter	0	0	2	20	0	4	2	0	28
d__Bacteria	k__unclassified_d__Bacteria	p__Armatimonadota	c__Chthonomonadetes	o__Chthonomonadales	f__Chthonomonadaceae	g__Chthonomonas	0	6	4	2	0	0	4	0	16
d__Bacteria	k__unclassified_d__Bacteria	p__Bacillota	c__Bacilli	o__Bacillales	f__Bacillaceae	g__Bacillus	2	6	46	18	0	4	4	4	84
d__Bacteria	k__unclassified_d__Bacteria	p__Bacillota	c__Bacilli	o__Bacillales	f__Bacillaceae	g__Neobacillus	0	10	16	8	2	0	0	6	42
d__Bacteria	k__unclassified_d__Bacteria	p__Bacillota	c__Bacilli	o__Bacillales	f__Paenibacillaceae	g__Paenibacillus	0	10	34	4	2	2	6	2	60
d__Bacteria	k__unclassified_d__Bacteria	p__Bacillota	c__Clostridia	o__Eubacteriales	f__Clostridiaceae	g__Clostridium	0	4	0	0	0	0	0	0	4
d__Bacteria	k__unclassified_d__Bacteria	p__Bacillota	c__Clostridia	o__Eubacteriales	f__Clostridiaceae	g__Youngiibacter	0	0	0	0	8	68	58	42	176
d__Bacteria	k__unclassified_d__Bacteria	p__Bacillota	c__Clostridia	o__Eubacteriales	f__Desulfitobacteriaceae	g__Desulfosporosinus	0	0	0	0	0	4	10	18	32
d__Bacteria	k__unclassified_d__Bacteria	p__Bacillota	c__Clostridia	o__Eubacteriales	f__Desulfotomaculaceae	g__Pelotomaculum	0	0	0	0	0	0	6	4	10
d__Bacteria	k__unclassified_d__Bacteria	p__Bacillota	c__Negativicutes	o__Selenomonadales	f__Sporomusaceae	g__Sporolituus	0	0	0	0	0	0	8	0	8
d__Bacteria	k__unclassified_d__Bacteria	p__Bacillota	c__Negativicutes	o__Selenomonadales	f__Sporomusaceae	g__Sporomusa	0	0	0	0	0	0	6	0	6
d__Bacteria	k__unclassified_d__Bacteria	p__Bacillota	c__Negativicutes	o__Selenomonadales	f__Sporomusaceae	g__Thermosinus	0	0	6	2	48	46	52	44	198
d__Bacteria	k__unclassified_d__Bacteria	p__Bacteroidota	c__Bacteroidia	o__Bacteroidales	f__Bacteroidaceae	g__Bacteroides	0	0	0	0	6	40	44	36	126
d__Bacteria	k__unclassified_d__Bacteria	p__Bacteroidota	c__Bacteroidia	o__Bacteroidales	f__Dysgonomonadaceae	g__Proteiniphilum	0	2	4	0	2	8	8	2	26
d__Bacteria	k__unclassified_d__Bacteria	p__Bacteroidota	c__Bacteroidia	o__Bacteroidales	f__Lentimicrobiaceae	g__Lentimicrobium	6	14	0	0	0	88	10	94	212
d__Bacteria	k__unclassified_d__Bacteria	p__Bacteroidota	c__Bacteroidia	o__Bacteroidales	f__Odoribacteraceae	g__Odoribacter	0	0	0	0	100	18	16	16	150
d__Bacteria	k__unclassified_d__Bacteria	p__Bacteroidota	c__Bacteroidia	o__Marinilabiliales	f__Prolixibacteraceae	g__Aquipluma	4	0	0	0	128	32	36	30	230
d__Bacteria	k__unclassified_d__Bacteria	p__Bacteroidota	c__Chitinophagia	o__Chitinophagales	f__Chitinophagaceae	g__Asinibacterium	84	0	0	0	46	0	0	0	130
d__Bacteria	k__unclassified_d__Bacteria	p__Bacteroidota	c__Chitinophagia	o__Chitinophagales	f__Chitinophagaceae	g__Chitinophaga	10	0	0	0	0	0	0	0	10
d__Bacteria	k__unclassified_d__Bacteria	p__Bacteroidota	c__Chitinophagia	o__Chitinophagales	f__Chitinophagaceae	g__Ferruginibacter	2	14	0	0	0	0	0	0	16
d__Bacteria	k__unclassified_d__Bacteria	p__Bacteroidota	c__Chitinophagia	o__Chitinophagales	f__Chitinophagaceae	g__Flavihumibacter	24	18	0	0	0	0	0	0	42
d__Bacteria	k__unclassified_d__Bacteria	p__Bacteroidota	c__Chitinophagia	o__Chitinophagales	f__Chitinophagaceae	g__Flavipsychrobacter	100	138	2	0	0	0	0	0	240
d__Bacteria	k__unclassified_d__Bacteria	p__Bacteroidota	c__Chitinophagia	o__Chitinophagales	f__Chitinophagaceae	g__Hydrotalea	56	10	4	0	206	2	2	0	280
d__Bacteria	k__unclassified_d__Bacteria	p__Bacteroidota	c__Chitinophagia	o__Chitinophagales	f__Chitinophagaceae	g__Lacibacter	640	2	0	0	0	0	0	0	642
d__Bacteria	k__unclassified_d__Bacteria	p__Bacteroidota	c__Chitinophagia	o__Chitinophagales	f__Chitinophagaceae	g__Niastella	50	124	0	0	8	0	0	0	182
d__Bacteria	k__unclassified_d__Bacteria	p__Bacteroidota	c__Chitinophagia	o__Chitinophagales	f__Chitinophagaceae	g__Sediminibacterium	342	72	166	44	130	130	108	74	1066
d__Bacteria	k__unclassified_d__Bacteria	p__Bacteroidota	c__Cytophagia	o__Cytophagales	f__Fulvivirgaceae	g__Chryseolinea	0	0	0	0	12	0	0	0	12
d__Bacteria	k__unclassified_d__Bacteria	p__Bacteroidota	c__Cytophagia	o__Cytophagales	f__Roseivirgaceae	g__Roseivirga	0	0	0	0	0	0	0	6	6
d__Bacteria	k__unclassified_d__Bacteria	p__Bacteroidota	c__Cytophagia	o__Cytophagales	f__Spirosomataceae	g__Emticicia	16	20	0	0	548	582	346	392	1904
d__Bacteria	k__unclassified_d__Bacteria	p__Bacteroidota	c__Cytophagia	o__Cytophagales	f__Spirosomataceae	g__Runella	24	22	0	0	0	0	0	0	46
d__Bacteria	k__unclassified_d__Bacteria	p__Bacteroidota	c__Flavobacteriia	o__Flavobacteriales	f__Cryomorphaceae	g__Cryomorpha	0	0	24	30	0	2	6	0	62
d__Bacteria	k__unclassified_d__Bacteria	p__Bacteroidota	c__Flavobacteriia	o__Flavobacteriales	f__Flavobacteriaceae	g__Flavobacterium	274	694	6	0	0	2	2	2	980
d__Bacteria	k__unclassified_d__Bacteria	p__Bacteroidota	c__Flavobacteriia	o__Flavobacteriales	f__Weeksellaceae	g__Cloacibacterium	2	6	0	0	0	0	0	0	8
d__Bacteria	k__unclassified_d__Bacteria	p__Bacteroidota	c__Flavobacteriia	o__Flavobacteriales	f__Weeksellaceae	g__Elizabethkingia	10	38	0	0	0	0	0	0	48
d__Bacteria	k__unclassified_d__Bacteria	p__Bacteroidota	c__Flavobacteriia	o__Flavobacteriales	f__Weeksellaceae	g__Empedobacter	6	12	0	0	2	0	2	0	22
d__Bacteria	k__unclassified_d__Bacteria	p__Bacteroidota	c__Flavobacteriia	o__Flavobacteriales	f__Weeksellaceae	g__Ornithobacterium	10	30	0	0	0	0	0	0	40
d__Bacteria	k__unclassified_d__Bacteria	p__Bacteroidota	c__Sphingobacteriia	o__Sphingobacteriales	f__Sphingobacteriaceae	g__Daejeonella	0	4	106	112	46	60	84	38	450
d__Bacteria	k__unclassified_d__Bacteria	p__Bacteroidota	c__Sphingobacteriia	o__Sphingobacteriales	f__Sphingobacteriaceae	g__Hufsiella	0	0	4	0	0	0	2	0	6
d__Bacteria	k__unclassified_d__Bacteria	p__Bacteroidota	c__Sphingobacteriia	o__Sphingobacteriales	f__Sphingobacteriaceae	g__Mucilaginibacter	0	8	0	0	0	0	0	0	8
d__Bacteria	k__unclassified_d__Bacteria	p__Bacteroidota	c__Sphingobacteriia	o__Sphingobacteriales	f__Sphingobacteriaceae	g__Pedobacter	4	10	0	0	0	0	0	0	14
d__Bacteria	k__unclassified_d__Bacteria	p__Bacteroidota	c__Sphingobacteriia	o__Sphingobacteriales	f__Sphingobacteriaceae	g__Sphingobacterium	38	82	6	0	0	0	0	0	126
d__Bacteria	k__unclassified_d__Bacteria	p__Bdellovibrionota	c__Bacteriovoracia	o__Bacteriovoracales	f__Bacteriovoracaceae	g__Bacteriovorax	18	48	0	0	0	20	50	14	150
d__Bacteria	k__unclassified_d__Bacteria	p__Bdellovibrionota	c__Bdellovibrionia	o__Bdellovibrionales	f__Pseudobdellovibrionaceae	g__Bdellovibrio	0	6	660	106	4	10	4	216	1006
d__Bacteria	k__unclassified_d__Bacteria	p__Bdellovibrionota	c__Bdellovibrionia	o__Bdellovibrionales	f__Pseudobdellovibrionaceae	g__Micavibrio	2	4	0	0	0	0	0	0	6
d__Bacteria	k__unclassified_d__Bacteria	p__Bdellovibrionota	c__Bdellovibrionia	o__Bdellovibrionales	f__Pseudobdellovibrionaceae	g__Pseudobdellovibrio	0	0	4	8	0	0	0	30	42
d__Bacteria	k__unclassified_d__Bacteria	p__Bdellovibrionota	c__Oligoflexia	o__Oligoflexales	f__Oligoflexaceae	g__Oligoflexus	0	0	0	0	10	36	24	22	92
d__Bacteria	k__unclassified_d__Bacteria	p__Calditrichota	c__Calditrichia	o__Calditrichales	f__Calditrichaceae	g__Caldithrix	0	0	0	0	0	12	0	4	16
d__Bacteria	k__unclassified_d__Bacteria	p__Candidatus_Aminicenantes	c__unclassified_p__Candidatus_Aminicenantes	o__unclassified_p__Candidatus_Aminicenantes	f__unclassified_p__Candidatus_Aminicenantes	g__unclassified_p__Candidatus_Aminicenantes	0	8	72	100	14	74	84	58	410
d__Bacteria	k__unclassified_d__Bacteria	p__Candidatus_Bipolaricaulota	c__unclassified_p__Candidatus_Bipolaricaulota	o__unclassified_p__Candidatus_Bipolaricaulota	f__unclassified_p__Candidatus_Bipolaricaulota	g__unclassified_p__Candidatus_Bipolaricaulota	0	0	10	6	0	0	2	0	18
d__Bacteria	k__unclassified_d__Bacteria	p__Candidatus_Dadabacteria	c__unclassified_p__Candidatus_Dadabacteria	o__unclassified_p__Candidatus_Dadabacteria	f__unclassified_p__Candidatus_Dadabacteria	g__unclassified_p__Candidatus_Dadabacteria	0	0	0	0	2	12	12	6	32
d__Bacteria	k__unclassified_d__Bacteria	p__Candidatus_Eisenbacteria	c__unclassified_p__Candidatus_Eisenbacteria	o__unclassified_p__Candidatus_Eisenbacteria	f__unclassified_p__Candidatus_Eisenbacteria	g__unclassified_p__Candidatus_Eisenbacteria	8	2	18	12	40	22	4	16	122
d__Bacteria	k__unclassified_d__Bacteria	p__Candidatus_Fischerbacteria	c__unclassified_p__Candidatus_Fischerbacteria	o__unclassified_p__Candidatus_Fischerbacteria	f__unclassified_p__Candidatus_Fischerbacteria	g__unclassified_p__Candidatus_Fischerbacteria	0	0	0	0	2	16	22	24	64
d__Bacteria	k__unclassified_d__Bacteria	p__Candidatus_Giovannonibacteria	c__unclassified_p__Candidatus_Giovannonibacteria	o__unclassified_p__Candidatus_Giovannonibacteria	f__unclassified_p__Candidatus_Giovannonibacteria	g__unclassified_p__Candidatus_Giovannonibacteria	0	2	2	8	0	0	0	0	12
d__Bacteria	k__unclassified_d__Bacteria	p__Candidatus_Hydrogenedentes	c__unclassified_p__Candidatus_Hydrogenedentes	o__unclassified_p__Candidatus_Hydrogenedentes	f__unclassified_p__Candidatus_Hydrogenedentes	g__unclassified_p__Candidatus_Hydrogenedentes	14	6	44	26	74	88	78	140	470
d__Bacteria	k__unclassified_d__Bacteria	p__Candidatus_Kapabacteria	c__unclassified_p__Candidatus_Kapabacteria	o__unclassified_p__Candidatus_Kapabacteria	f__unclassified_p__Candidatus_Kapabacteria	g__unclassified_p__Candidatus_Kapabacteria	0	0	0	0	10	300	340	170	820
d__Bacteria	k__unclassified_d__Bacteria	p__Candidatus_Kryptonia	c__unclassified_p__Candidatus_Kryptonia	o__unclassified_p__Candidatus_Kryptonia	f__unclassified_p__Candidatus_Kryptonia	g__Candidatus_Kryptonium	0	2	0	2	0	2	2	0	8
d__Bacteria	k__unclassified_d__Bacteria	p__Candidatus_Latescibacteria	c__unclassified_p__Candidatus_Latescibacteria	o__unclassified_p__Candidatus_Latescibacteria	f__unclassified_p__Candidatus_Latescibacteria	g__unclassified_p__Candidatus_Latescibacteria	0	0	2	12	2	140	218	88	462
d__Bacteria	k__unclassified_d__Bacteria	p__Candidatus_Marinimicrobia	c__unclassified_p__Candidatus_Marinimicrobia	o__unclassified_p__Candidatus_Marinimicrobia	f__unclassified_p__Candidatus_Marinimicrobia	g__unclassified_p__Candidatus_Marinimicrobia	0	0	0	0	0	8	16	6	30
d__Bacteria	k__unclassified_d__Bacteria	p__Candidatus_Omnitrophota	c__unclassified_p__Candidatus_Omnitrophota	o__unclassified_p__Candidatus_Omnitrophota	f__unclassified_p__Candidatus_Omnitrophota	g__unclassified_p__Candidatus_Omnitrophota	0	0	4	8	18	78	128	178	414
d__Bacteria	k__unclassified_d__Bacteria	p__Candidatus_Poribacteria	c__unclassified_p__Candidatus_Poribacteria	o__unclassified_p__Candidatus_Poribacteria	f__unclassified_p__Candidatus_Poribacteria	g__unclassified_p__Candidatus_Poribacteria	0	0	20	16	2	6	4	34	82
d__Bacteria	k__unclassified_d__Bacteria	p__Candidatus_Saccharibacteria	c__Candidatus_Saccharimonadia	o__Candidatus_Saccharimonadales	f__Candidatus_Saccharimonadaceae	g__Candidatus_Saccharimonas	8	0	0	0	0	0	0	0	8
d__Bacteria	k__unclassified_d__Bacteria	p__Candidatus_Sumerlaeota	c__unclassified_p__Candidatus_Sumerlaeota	o__unclassified_p__Candidatus_Sumerlaeota	f__unclassified_p__Candidatus_Sumerlaeota	g__unclassified_p__Candidatus_Sumerlaeota	0	0	2	2	4	36	38	18	100
d__Bacteria	k__unclassified_d__Bacteria	p__Candidatus_Tectomicrobia	c__unclassified_p__Candidatus_Tectomicrobia	o__unclassified_p__Candidatus_Tectomicrobia	f__unclassified_p__Candidatus_Tectomicrobia	g__unclassified_p__Candidatus_Tectomicrobia	0	2	6	8	0	4	2	0	22
d__Bacteria	k__unclassified_d__Bacteria	p__Candidatus_Zambryskibacteria	c__unclassified_p__Candidatus_Zambryskibacteria	o__unclassified_p__Candidatus_Zambryskibacteria	f__unclassified_p__Candidatus_Zambryskibacteria	g__unclassified_p__Candidatus_Zambryskibacteria	0	0	6	26	0	0	0	0	32
d__Bacteria	k__unclassified_d__Bacteria	p__Chlamydiota	c__Chlamydiia	o__Parachlamydiales	f__Parachlamydiaceae	g__Candidatus_Protochlamydia	4	4	28	0	0	0	2	0	38
d__Bacteria	k__unclassified_d__Bacteria	p__Chlamydiota	c__Chlamydiia	o__Parachlamydiales	f__Parachlamydiaceae	g__Parachlamydia	0	0	0	0	4	8	0	4	16
d__Bacteria	k__unclassified_d__Bacteria	p__Chlorobiota	c__Chlorobiia	o__Chlorobiales	f__Chloroherpetonaceae	g__unclassified_f__Chloroherpetonaceae	0	0	8	4	10	24	4	6	56
d__Bacteria	k__unclassified_d__Bacteria	p__Chloroflexota	c__Anaerolineae	o__Aggregatilineales	f__Aggregatilineaceae	g__Aggregatilinea	0	6	74	58	22	116	108	124	508
d__Bacteria	k__unclassified_d__Bacteria	p__Chloroflexota	c__Anaerolineae	o__Anaerolineales	f__Anaerolineaceae	g__Anaerolinea	2	10	146	94	74	362	336	356	1380
d__Bacteria	k__unclassified_d__Bacteria	p__Chloroflexota	c__Anaerolineae	o__Anaerolineales	f__Anaerolineaceae	g__Bellilinea	0	0	0	0	10	74	62	60	206
d__Bacteria	k__unclassified_d__Bacteria	p__Chloroflexota	c__Anaerolineae	o__Anaerolineales	f__Anaerolineaceae	g__Leptolinea	0	0	0	0	4	16	6	4	30
d__Bacteria	k__unclassified_d__Bacteria	p__Chloroflexota	c__Anaerolineae	o__Anaerolineales	f__Anaerolineaceae	g__Levilinea	0	0	8	10	22	124	156	270	590
d__Bacteria	k__unclassified_d__Bacteria	p__Chloroflexota	c__Anaerolineae	o__Anaerolineales	f__Anaerolineaceae	g__Longilinea	2	2	46	28	80	426	532	676	1792
d__Bacteria	k__unclassified_d__Bacteria	p__Chloroflexota	c__Anaerolineae	o__Anaerolineales	f__Anaerolineaceae	g__Thermanaerothrix	0	0	0	0	2	20	6	24	52
d__Bacteria	k__unclassified_d__Bacteria	p__Chloroflexota	c__Caldilineae	o__Caldilineales	f__Caldilineaceae	g__Caldilinea	0	0	46	80	16	84	54	60	340
d__Bacteria	k__unclassified_d__Bacteria	p__Chloroflexota	c__Candidatus_Thermofonsia	o__unclassified_c__Candidatus_Thermofonsia	f__unclassified_c__Candidatus_Thermofonsia	g__Candidatus_Roseilinea	0	0	0	2	2	38	22	10	74
d__Bacteria	k__unclassified_d__Bacteria	p__Chloroflexota	c__Chloroflexia	o__Chloroflexales	f__Roseiflexaceae	g__Kouleothrix	0	0	2	0	0	0	0	8	10
d__Bacteria	k__unclassified_d__Bacteria	p__Chloroflexota	c__Dehalococcoidia	o__Dehalococcoidales	f__Dehalococcoidaceae	g__Dehalococcoides	0	0	14	2	0	0	0	0	16
d__Bacteria	k__unclassified_d__Bacteria	p__Cyanobacteriota	c__Cyanophyceae	o__Gloeobacterales	f__Gloeobacteraceae	g__Gloeobacter	0	0	0	50	0	8	0	0	58
d__Bacteria	k__unclassified_d__Bacteria	p__Cyanobacteriota	c__Cyanophyceae	o__Leptolyngbyales	f__Leptolyngbyaceae	g__Leptolyngbya	0	0	0	12	0	0	0	0	12
d__Bacteria	k__unclassified_d__Bacteria	p__Cyanobacteriota	c__Cyanophyceae	o__Leptolyngbyales	f__Leptolyngbyaceae	g__unclassified_f__Leptolyngbyaceae	0	0	0	10	0	0	0	0	10
d__Bacteria	k__unclassified_d__Bacteria	p__Cyanobacteriota	c__Cyanophyceae	o__Nostocales	f__Calotrichaceae	g__Calothrix	0	2	132	6	0	0	0	0	140
d__Bacteria	k__unclassified_d__Bacteria	p__Cyanobacteriota	c__Cyanophyceae	o__Oculatellales	f__Oculatellaceae	g__Kaiparowitsia	4	56	216	64	34	16	50	50	490
d__Bacteria	k__unclassified_d__Bacteria	p__Cyanobacteriota	c__Cyanophyceae	o__Pleurocapsales	f__Hyellaceae	g__Pleurocapsa	0	4	56	34	50	72	76	104	396
d__Bacteria	k__unclassified_d__Bacteria	p__Cyanobacteriota	c__Cyanophyceae	o__Synechococcales	f__Prochlorococcaceae	g__Cyanobium	0	0	28	30	0	0	0	0	58
d__Bacteria	k__unclassified_d__Bacteria	p__Deinococcota	c__Deinococci	o__Deinococcales	f__Deinococcaceae	g__Deinococcus	2	12	50	8	4	12	16	8	112
d__Bacteria	k__unclassified_d__Bacteria	p__Deinococcota	c__Deinococci	o__Thermales	f__Thermaceae	g__Thermus	0	6	4	2	2	4	0	0	18
d__Bacteria	k__unclassified_d__Bacteria	p__Gemmatimonadota	c__Gemmatimonadetes	o__Gemmatimonadales	f__Gemmatimonadaceae	g__Gemmatimonas	42	28	70	46	178	186	176	224	950
d__Bacteria	k__unclassified_d__Bacteria	p__Gemmatimonadota	c__Gemmatimonadetes	o__Gemmatimonadales	f__Gemmatimonadaceae	g__Gemmatirosa	2	6	28	28	0	2	0	2	68
d__Bacteria	k__unclassified_d__Bacteria	p__Gemmatimonadota	c__Gemmatimonadetes	o__Gemmatimonadales	f__Gemmatimonadaceae	g__Roseisolibacter	2	10	64	8	0	6	0	6	96
d__Bacteria	k__unclassified_d__Bacteria	p__Gemmatimonadota	c__Longimicrobiia	o__Longimicrobiales	f__Longimicrobiaceae	g__Longimicrobium	0	16	64	34	0	2	0	0	116
d__Bacteria	k__unclassified_d__Bacteria	p__Ignavibacteriota	c__Ignavibacteria	o__Ignavibacteriales	f__Ignavibacteriaceae	g__Ignavibacterium	0	4	0	0	266	38	82	350	740
d__Bacteria	k__unclassified_d__Bacteria	p__Ignavibacteriota	c__Ignavibacteria	o__Ignavibacteriales	f__Melioribacteraceae	g__Melioribacter	0	0	0	0	0	38	72	10	120
d__Bacteria	k__unclassified_d__Bacteria	p__Myxococcota	c__Myxococcia	o__Myxococcales	f__Anaeromyxobacteraceae	g__Anaeromyxobacter	6	28	140	150	74	184	254	438	1274
d__Bacteria	k__unclassified_d__Bacteria	p__Myxococcota	c__Myxococcia	o__Myxococcales	f__Archangiaceae	g__Archangium	0	0	0	0	50	8	8	12	78
d__Bacteria	k__unclassified_d__Bacteria	p__Myxococcota	c__Myxococcia	o__Myxococcales	f__Myxococcaceae	g__Myxococcus	0	0	0	0	20	0	0	0	20
d__Bacteria	k__unclassified_d__Bacteria	p__Myxococcota	c__Myxococcia	o__Myxococcales	f__unclassified_o__Myxococcales	g__Enhygromyxa	0	2	0	24	0	0	0	0	26
d__Bacteria	k__unclassified_d__Bacteria	p__Myxococcota	c__unclassified_p__Myxococcota	o__Haliangiales	f__Kofleriaceae	g__Haliangium	0	0	0	4	0	0	0	2	6
d__Bacteria	k__unclassified_d__Bacteria	p__Myxococcota	c__unclassified_p__Myxococcota	o__Nannocystales	f__Nannocystaceae	g__Nannocystis	0	0	18	30	34	32	4	4	122
d__Bacteria	k__unclassified_d__Bacteria	p__Myxococcota	c__unclassified_p__Myxococcota	o__Nannocystales	f__Nannocystaceae	g__Pseudenhygromyxa	0	0	0	2	0	0	2	0	4
d__Bacteria	k__unclassified_d__Bacteria	p__Myxococcota	c__unclassified_p__Myxococcota	o__Polyangiales	f__Polyangiaceae	g__Minicystis	0	0	12	6	42	84	8	20	172
d__Bacteria	k__unclassified_d__Bacteria	p__Myxococcota	c__unclassified_p__Myxococcota	o__Polyangiales	f__Polyangiaceae	g__Polyangium	0	0	32	10	0	0	0	0	42
d__Bacteria	k__unclassified_d__Bacteria	p__Myxococcota	c__unclassified_p__Myxococcota	o__Polyangiales	f__Polyangiaceae	g__Sorangium	0	2	22	48	84	130	22	32	340
d__Bacteria	k__unclassified_d__Bacteria	p__Nitrospirota	c__Nitrospiria	o__Candidatus_Troglogloeales	f__Candidatus_Manganitrophaceae	g__Candidatus_Manganitrophus	0	0	10	4	0	0	0	0	14
d__Bacteria	k__unclassified_d__Bacteria	p__Nitrospirota	c__Nitrospiria	o__Nitrospirales	f__Nitrospiraceae	g__Nitrospira	26	100	916	698	946	214	90	948	3938
d__Bacteria	k__unclassified_d__Bacteria	p__Planctomycetota	c__Candidatus_Brocadiia	o__Candidatus_Brocadiales	f__Candidatus_Brocadiaceae	g__Candidatus_Kuenenia	0	0	0	34	0	0	0	0	34
d__Bacteria	k__unclassified_d__Bacteria	p__Planctomycetota	c__Phycisphaerae	o__Phycisphaerales	f__Phycisphaeraceae	g__Phycisphaera	0	0	0	0	2	8	0	2	12
d__Bacteria	k__unclassified_d__Bacteria	p__Planctomycetota	c__Planctomycetia	o__Gemmatales	f__Gemmataceae	g__Zavarzinella	0	0	0	18	0	0	4	24	46
d__Bacteria	k__unclassified_d__Bacteria	p__Planctomycetota	c__Planctomycetia	o__Isosphaerales	f__Isosphaeraceae	g__Paludisphaera	2	2	8	18	2	0	2	2	36
d__Bacteria	k__unclassified_d__Bacteria	p__Planctomycetota	c__Planctomycetia	o__Isosphaerales	f__Isosphaeraceae	g__Singulisphaera	0	0	10	2	0	0	0	0	12
d__Bacteria	k__unclassified_d__Bacteria	p__Planctomycetota	c__Planctomycetia	o__Pirellulales	f__Lacipirellulaceae	g__Bythopirellula	0	0	0	0	0	54	2	12	68
d__Bacteria	k__unclassified_d__Bacteria	p__Planctomycetota	c__Planctomycetia	o__Pirellulales	f__Pirellulaceae	g__Anatilimnocola	42	0	0	0	0	0	0	0	42
d__Bacteria	k__unclassified_d__Bacteria	p__Planctomycetota	c__Planctomycetia	o__Pirellulales	f__Pirellulaceae	g__Aureliella	0	10	0	0	0	0	0	0	10
d__Bacteria	k__unclassified_d__Bacteria	p__Planctomycetota	c__Planctomycetia	o__Pirellulales	f__Pirellulaceae	g__Bremerella	0	0	6	12	0	0	8	0	26
d__Bacteria	k__unclassified_d__Bacteria	p__Planctomycetota	c__Planctomycetia	o__Pirellulales	f__Pirellulaceae	g__Novipirellula	0	0	0	0	0	18	0	0	18
d__Bacteria	k__unclassified_d__Bacteria	p__Planctomycetota	c__Planctomycetia	o__Pirellulales	f__Pirellulaceae	g__Pirellula	0	8	26	0	0	4	2	2	42
d__Bacteria	k__unclassified_d__Bacteria	p__Planctomycetota	c__Planctomycetia	o__Pirellulales	f__Pirellulaceae	g__Rhodopirellula	0	0	0	0	18	0	0	0	18
d__Bacteria	k__unclassified_d__Bacteria	p__Planctomycetota	c__Planctomycetia	o__Pirellulales	f__Pirellulaceae	g__Rubripirellula	0	4	12	0	0	0	0	0	16
d__Bacteria	k__unclassified_d__Bacteria	p__Planctomycetota	c__Planctomycetia	o__Pirellulales	f__Thermoguttaceae	g__Thermogutta	0	0	0	0	0	8	10	6	24
d__Bacteria	k__unclassified_d__Bacteria	p__Planctomycetota	c__Planctomycetia	o__Planctomycetales	f__Planctomycetaceae	g__Gimesia	2	2	14	8	0	2	0	6	34
d__Bacteria	k__unclassified_d__Bacteria	p__Planctomycetota	c__Planctomycetia	o__Planctomycetales	f__Planctomycetaceae	g__Planctomyces	0	4	4	6	0	0	0	0	14
d__Bacteria	k__unclassified_d__Bacteria	p__Planctomycetota	c__Planctomycetia	o__Planctomycetales	f__Planctomycetaceae	g__Schlesneria	56	52	52	12	154	10	20	44	400
d__Bacteria	k__unclassified_d__Bacteria	p__Planctomycetota	c__Planctomycetia	o__Planctomycetales	f__Planctomycetaceae	g__Stratiformator	0	8	20	12	0	2	0	0	42
d__Bacteria	k__unclassified_d__Bacteria	p__Planctomycetota	c__Planctomycetia	o__Planctomycetales	f__Planctomycetaceae	g__Symmachiella	0	0	0	4	2	2	6	10	24
d__Bacteria	k__unclassified_d__Bacteria	p__Pseudomonadota	c__Acidithiobacillia	o__Acidithiobacillales	f__Thermithiobacillaceae	g__Thermithiobacillus	0	0	6	8	0	0	0	0	14
d__Bacteria	k__unclassified_d__Bacteria	p__Pseudomonadota	c__Alphaproteobacteria	o__Caulobacterales	f__Caulobacteraceae	g__Brevundimonas	360	1452	904	1142	408	318	286	148	5018
d__Bacteria	k__unclassified_d__Bacteria	p__Pseudomonadota	c__Alphaproteobacteria	o__Caulobacterales	f__Caulobacteraceae	g__Caulobacter	166	32	26	8	330	242	122	104	1030
d__Bacteria	k__unclassified_d__Bacteria	p__Pseudomonadota	c__Alphaproteobacteria	o__Caulobacterales	f__Caulobacteraceae	g__Phenylobacterium	642	108	306	182	230	682	748	786	3684
d__Bacteria	k__unclassified_d__Bacteria	p__Pseudomonadota	c__Alphaproteobacteria	o__Hyphomicrobiales	f__Aestuariivirgaceae	g__Aestuariivirga	46	0	10	2	26	0	6	24	114
d__Bacteria	k__unclassified_d__Bacteria	p__Pseudomonadota	c__Alphaproteobacteria	o__Hyphomicrobiales	f__Ancalomicrobiaceae	g__Siculibacillus	0	0	0	0	0	4	2	2	8
d__Bacteria	k__unclassified_d__Bacteria	p__Pseudomonadota	c__Alphaproteobacteria	o__Hyphomicrobiales	f__Beijerinckiaceae	g__Rhodoblastus	0	0	0	0	0	0	0	8	8
d__Bacteria	k__unclassified_d__Bacteria	p__Pseudomonadota	c__Alphaproteobacteria	o__Hyphomicrobiales	f__Boseaceae	g__Bosea	42	18	74	6	72	20	20	32	284
d__Bacteria	k__unclassified_d__Bacteria	p__Pseudomonadota	c__Alphaproteobacteria	o__Hyphomicrobiales	f__Devosiaceae	g__Devosia	512	948	308	158	782	736	356	720	4520
d__Bacteria	k__unclassified_d__Bacteria	p__Pseudomonadota	c__Alphaproteobacteria	o__Hyphomicrobiales	f__Hyphomicrobiaceae	g__Hyphomicrobium	0	0	0	0	0	26	12	62	100
d__Bacteria	k__unclassified_d__Bacteria	p__Pseudomonadota	c__Alphaproteobacteria	o__Hyphomicrobiales	f__Hyphomicrobiaceae	g__Rhodoplanes	4	0	0	0	22	0	0	0	26
d__Bacteria	k__unclassified_d__Bacteria	p__Pseudomonadota	c__Alphaproteobacteria	o__Hyphomicrobiales	f__Kaistiaceae	g__Kaistia	0	0	0	0	14	0	0	0	14
d__Bacteria	k__unclassified_d__Bacteria	p__Pseudomonadota	c__Alphaproteobacteria	o__Hyphomicrobiales	f__Methylobacteriaceae	g__Methylobacterium	4	4	0	0	28	4	0	6	46
d__Bacteria	k__unclassified_d__Bacteria	p__Pseudomonadota	c__Alphaproteobacteria	o__Hyphomicrobiales	f__Methylobacteriaceae	g__Methylorubrum	0	0	0	0	32	4	6	10	52
d__Bacteria	k__unclassified_d__Bacteria	p__Pseudomonadota	c__Alphaproteobacteria	o__Hyphomicrobiales	f__Methylobacteriaceae	g__Microvirga	4	46	22	2	118	20	32	38	282
d__Bacteria	k__unclassified_d__Bacteria	p__Pseudomonadota	c__Alphaproteobacteria	o__Hyphomicrobiales	f__Methylocystaceae	g__Methylocystis	0	0	0	0	4	52	60	36	152
d__Bacteria	k__unclassified_d__Bacteria	p__Pseudomonadota	c__Alphaproteobacteria	o__Hyphomicrobiales	f__Nitrobacteraceae	g__Afipia	794	78	74	48	2226	222	174	424	4040
d__Bacteria	k__unclassified_d__Bacteria	p__Pseudomonadota	c__Alphaproteobacteria	o__Hyphomicrobiales	f__Nitrobacteraceae	g__Bradyrhizobium	108	114	94	26	672	188	176	442	1820
d__Bacteria	k__unclassified_d__Bacteria	p__Pseudomonadota	c__Alphaproteobacteria	o__Hyphomicrobiales	f__Nitrobacteraceae	g__Nitrobacter	0	0	0	0	24	0	0	4	28
d__Bacteria	k__unclassified_d__Bacteria	p__Pseudomonadota	c__Alphaproteobacteria	o__Hyphomicrobiales	f__Nitrobacteraceae	g__Rhodopseudomonas	2	0	4	4	8	20	34	30	102
d__Bacteria	k__unclassified_d__Bacteria	p__Pseudomonadota	c__Alphaproteobacteria	o__Hyphomicrobiales	f__Parvibaculaceae	g__Parvibaculum	0	4	8	0	0	0	0	0	12
d__Bacteria	k__unclassified_d__Bacteria	p__Pseudomonadota	c__Alphaproteobacteria	o__Hyphomicrobiales	f__Phreatobacteraceae	g__Phreatobacter	0	6	0	0	6	18	2	4	36
d__Bacteria	k__unclassified_d__Bacteria	p__Pseudomonadota	c__Alphaproteobacteria	o__Hyphomicrobiales	f__Phyllobacteriaceae	g__Aminobacter	312	1150	1586	1052	370	34	14	8	4526
d__Bacteria	k__unclassified_d__Bacteria	p__Pseudomonadota	c__Alphaproteobacteria	o__Hyphomicrobiales	f__Phyllobacteriaceae	g__Mesorhizobium	242	44	88	32	164	124	52	70	816
d__Bacteria	k__unclassified_d__Bacteria	p__Pseudomonadota	c__Alphaproteobacteria	o__Hyphomicrobiales	f__Phyllobacteriaceae	g__Pseudaminobacter	20	4	0	0	30	14	6	0	74
d__Bacteria	k__unclassified_d__Bacteria	p__Pseudomonadota	c__Alphaproteobacteria	o__Hyphomicrobiales	f__Reyranellaceae	g__Reyranella	78	22	80	6	18	156	66	192	618
d__Bacteria	k__unclassified_d__Bacteria	p__Pseudomonadota	c__Alphaproteobacteria	o__Hyphomicrobiales	f__Rhizobiaceae	g__Agrobacterium	12	2	0	0	0	0	0	0	14
d__Bacteria	k__unclassified_d__Bacteria	p__Pseudomonadota	c__Alphaproteobacteria	o__Hyphomicrobiales	f__Rhizobiaceae	g__Ciceribacter	6	44	54	22	112	108	66	76	488
d__Bacteria	k__unclassified_d__Bacteria	p__Pseudomonadota	c__Alphaproteobacteria	o__Hyphomicrobiales	f__Rhizobiaceae	g__Ensifer	6	0	0	0	0	0	0	10	16
d__Bacteria	k__unclassified_d__Bacteria	p__Pseudomonadota	c__Alphaproteobacteria	o__Hyphomicrobiales	f__Rhizobiaceae	g__Pseudorhizobium	46	0	10	8	0	0	0	0	64
d__Bacteria	k__unclassified_d__Bacteria	p__Pseudomonadota	c__Alphaproteobacteria	o__Hyphomicrobiales	f__Rhizobiaceae	g__Rhizobium	124	60	102	24	268	682	758	702	2720
d__Bacteria	k__unclassified_d__Bacteria	p__Pseudomonadota	c__Alphaproteobacteria	o__Hyphomicrobiales	f__Rhizobiaceae	g__Shinella	3308	840	1412	150	3200	456	134	156	9656
d__Bacteria	k__unclassified_d__Bacteria	p__Pseudomonadota	c__Alphaproteobacteria	o__Hyphomicrobiales	f__Stappiaceae	g__Roseibium	6	16	0	0	0	0	0	0	22
d__Bacteria	k__unclassified_d__Bacteria	p__Pseudomonadota	c__Alphaproteobacteria	o__Hyphomicrobiales	f__Xanthobacteraceae	g__Pseudolabrys	10	6	26	10	0	0	0	4	56
d__Bacteria	k__unclassified_d__Bacteria	p__Pseudomonadota	c__Alphaproteobacteria	o__Hyphomicrobiales	f__unclassified_o__Hyphomicrobiales	g__Pseudorhodoplanes	0	0	2	0	0	0	2	0	4
d__Bacteria	k__unclassified_d__Bacteria	p__Pseudomonadota	c__Alphaproteobacteria	o__Hyphomicrobiales	f__unclassified_o__Hyphomicrobiales	g__Vineibacter	0	0	0	0	0	20	2	12	34
d__Bacteria	k__unclassified_d__Bacteria	p__Pseudomonadota	c__Alphaproteobacteria	o__Hyphomonadales	f__Hyphomonadaceae	g__Henriciella	0	0	2	50	4	4	12	4	76
d__Bacteria	k__unclassified_d__Bacteria	p__Pseudomonadota	c__Alphaproteobacteria	o__Hyphomonadales	f__Hyphomonadaceae	g__Hirschia	2	0	0	0	0	0	0	0	2
d__Bacteria	k__unclassified_d__Bacteria	p__Pseudomonadota	c__Alphaproteobacteria	o__Hyphomonadales	f__Hyphomonadaceae	g__Hyphomonas	2	0	0	0	2	0	0	0	4
d__Bacteria	k__unclassified_d__Bacteria	p__Pseudomonadota	c__Alphaproteobacteria	o__Micropepsales	f__Micropepsaceae	g__Rhizomicrobium	0	0	0	0	0	8	4	22	34
d__Bacteria	k__unclassified_d__Bacteria	p__Pseudomonadota	c__Alphaproteobacteria	o__Rhodobacterales	f__Paracoccaceae	g__Cereibacter	6	36	0	0	4	4	4	2	56
d__Bacteria	k__unclassified_d__Bacteria	p__Pseudomonadota	c__Alphaproteobacteria	o__Rhodobacterales	f__Paracoccaceae	g__Defluviimonas	14	42	60	10	278	38	18	14	474
d__Bacteria	k__unclassified_d__Bacteria	p__Pseudomonadota	c__Alphaproteobacteria	o__Rhodobacterales	f__Paracoccaceae	g__Gemmobacter	12	30	0	0	0	0	0	0	42
d__Bacteria	k__unclassified_d__Bacteria	p__Pseudomonadota	c__Alphaproteobacteria	o__Rhodobacterales	f__Paracoccaceae	g__Phycocomes	4	0	0	0	0	0	0	0	4
d__Bacteria	k__unclassified_d__Bacteria	p__Pseudomonadota	c__Alphaproteobacteria	o__Rhodobacterales	f__Paracoccaceae	g__Pseudorhodobacter	0	0	0	4	0	0	0	0	4
d__Bacteria	k__unclassified_d__Bacteria	p__Pseudomonadota	c__Alphaproteobacteria	o__Rhodobacterales	f__Paracoccaceae	g__Rhodobacter	6	18	74	20	504	52	16	4	694
d__Bacteria	k__unclassified_d__Bacteria	p__Pseudomonadota	c__Alphaproteobacteria	o__Rhodobacterales	f__Paracoccaceae	g__Tabrizicola	48	144	180	60	1910	182	138	28	2690
d__Bacteria	k__unclassified_d__Bacteria	p__Pseudomonadota	c__Alphaproteobacteria	o__Rhodobacterales	f__Roseobacteraceae	g__Oceanicola	2	10	0	0	0	0	0	0	12
d__Bacteria	k__unclassified_d__Bacteria	p__Pseudomonadota	c__Alphaproteobacteria	o__Rhodobacterales	f__Roseobacteraceae	g__Roseibacterium	4	12	0	6	0	2	0	2	26
d__Bacteria	k__unclassified_d__Bacteria	p__Pseudomonadota	c__Alphaproteobacteria	o__Rhodospirillales	f__Acetobacteraceae	g__Acidocella	2	0	0	0	2	2	2	0	8
d__Bacteria	k__unclassified_d__Bacteria	p__Pseudomonadota	c__Alphaproteobacteria	o__Rhodospirillales	f__Acetobacteraceae	g__Roseicella	0	0	12	2	0	0	0	0	14
d__Bacteria	k__unclassified_d__Bacteria	p__Pseudomonadota	c__Alphaproteobacteria	o__Rhodospirillales	f__Azospirillaceae	g__Azospirillum	0	0	0	0	0	38	6	14	58
d__Bacteria	k__unclassified_d__Bacteria	p__Pseudomonadota	c__Alphaproteobacteria	o__Rhodospirillales	f__Rhodospirillaceae	g__Caenispirillum	0	0	0	0	0	46	8	0	54
d__Bacteria	k__unclassified_d__Bacteria	p__Pseudomonadota	c__Alphaproteobacteria	o__Rhodospirillales	f__Rhodospirillaceae	g__Magnetospirillum	0	0	0	0	0	6	10	10	26
d__Bacteria	k__unclassified_d__Bacteria	p__Pseudomonadota	c__Alphaproteobacteria	o__Rhodospirillales	f__Thalassobaculaceae	g__Oceanibaculum	0	0	0	0	0	0	0	2	2
d__Bacteria	k__unclassified_d__Bacteria	p__Pseudomonadota	c__Alphaproteobacteria	o__Rhodospirillales	f__Zavarziniaceae	g__Zavarzinia	0	0	0	0	134	18	32	36	220
d__Bacteria	k__unclassified_d__Bacteria	p__Pseudomonadota	c__Alphaproteobacteria	o__Sneathiellales	f__Sneathiellaceae	g__Sneathiella	0	0	0	0	0	0	0	8	8
d__Bacteria	k__unclassified_d__Bacteria	p__Pseudomonadota	c__Alphaproteobacteria	o__Sphingomonadales	f__Erythrobacteraceae	g__Alteraurantiacibacter	0	0	4	6	0	0	0	0	10
d__Bacteria	k__unclassified_d__Bacteria	p__Pseudomonadota	c__Alphaproteobacteria	o__Sphingomonadales	f__Erythrobacteraceae	g__Altererythrobacter	0	0	16	22	0	0	4	32	74
d__Bacteria	k__unclassified_d__Bacteria	p__Pseudomonadota	c__Alphaproteobacteria	o__Sphingomonadales	f__Erythrobacteraceae	g__Aurantiacibacter	0	2	6	2	0	0	0	0	10
d__Bacteria	k__unclassified_d__Bacteria	p__Pseudomonadota	c__Alphaproteobacteria	o__Sphingomonadales	f__Erythrobacteraceae	g__Croceibacterium	0	12	92	42	0	0	0	0	146
d__Bacteria	k__unclassified_d__Bacteria	p__Pseudomonadota	c__Alphaproteobacteria	o__Sphingomonadales	f__Erythrobacteraceae	g__Erythrobacter	6	10	36	28	2	0	0	4	86
d__Bacteria	k__unclassified_d__Bacteria	p__Pseudomonadota	c__Alphaproteobacteria	o__Sphingomonadales	f__Erythrobacteraceae	g__Porphyrobacter	0	0	16	32	0	0	0	0	48
d__Bacteria	k__unclassified_d__Bacteria	p__Pseudomonadota	c__Alphaproteobacteria	o__Sphingomonadales	f__Erythrobacteraceae	g__Qipengyuania	2	4	0	0	6	0	0	0	12
d__Bacteria	k__unclassified_d__Bacteria	p__Pseudomonadota	c__Alphaproteobacteria	o__Sphingomonadales	f__Erythrobacteraceae	g__Tsuneonella	8	18	78	104	2	0	8	68	286
d__Bacteria	k__unclassified_d__Bacteria	p__Pseudomonadota	c__Alphaproteobacteria	o__Sphingomonadales	f__Sphingomonadaceae	g__Blastomonas	6	0	0	0	30	0	0	0	36
d__Bacteria	k__unclassified_d__Bacteria	p__Pseudomonadota	c__Alphaproteobacteria	o__Sphingomonadales	f__Sphingomonadaceae	g__Novosphingobium	148	72	198	100	146	34	20	140	858
d__Bacteria	k__unclassified_d__Bacteria	p__Pseudomonadota	c__Alphaproteobacteria	o__Sphingomonadales	f__Sphingomonadaceae	g__Parasphingopyxis	0	2	2	8	0	0	0	0	12
d__Bacteria	k__unclassified_d__Bacteria	p__Pseudomonadota	c__Alphaproteobacteria	o__Sphingomonadales	f__Sphingomonadaceae	g__Rhizorhabdus	16	2	14	8	164	104	48	44	400
d__Bacteria	k__unclassified_d__Bacteria	p__Pseudomonadota	c__Alphaproteobacteria	o__Sphingomonadales	f__Sphingomonadaceae	g__Sphingobium	72	140	472	260	96	56	46	190	1332
d__Bacteria	k__unclassified_d__Bacteria	p__Pseudomonadota	c__Alphaproteobacteria	o__Sphingomonadales	f__Sphingomonadaceae	g__Sphingomonas	138	60	94	108	366	30	30	446	1272
d__Bacteria	k__unclassified_d__Bacteria	p__Pseudomonadota	c__Alphaproteobacteria	o__Sphingomonadales	f__Sphingomonadaceae	g__Sphingopyxis	320	862	3014	1906	74	154	146	694	7170
d__Bacteria	k__unclassified_d__Bacteria	p__Pseudomonadota	c__Alphaproteobacteria	o__Sphingomonadales	f__Sphingomonadaceae	g__Sphingorhabdus	74	188	0	0	14	0	0	0	276
d__Bacteria	k__unclassified_d__Bacteria	p__Pseudomonadota	c__Alphaproteobacteria	o__Sphingomonadales	f__Sphingomonadaceae	g__Stakelama	0	8	0	0	0	0	0	0	8
d__Bacteria	k__unclassified_d__Bacteria	p__Pseudomonadota	c__Alphaproteobacteria	o__Sphingomonadales	f__Sphingosinicellaceae	g__Sphingosinicella	42	172	580	370	22	16	32	42	1276
d__Bacteria	k__unclassified_d__Bacteria	p__Pseudomonadota	c__Betaproteobacteria	o__Burkholderiales	f__Alcaligenaceae	g__Achromobacter	14	8	38	28	4	2	4	2	100
d__Bacteria	k__unclassified_d__Bacteria	p__Pseudomonadota	c__Betaproteobacteria	o__Burkholderiales	f__Alcaligenaceae	g__Derxia	0	0	0	0	0	0	2	0	2
d__Bacteria	k__unclassified_d__Bacteria	p__Pseudomonadota	c__Betaproteobacteria	o__Burkholderiales	f__Alcaligenaceae	g__Pigmentiphaga	0	0	10	0	0	0	0	0	10
d__Bacteria	k__unclassified_d__Bacteria	p__Pseudomonadota	c__Betaproteobacteria	o__Burkholderiales	f__Burkholderiaceae	g__Burkholderia	76	14	30	28	2	82	100	34	366
d__Bacteria	k__unclassified_d__Bacteria	p__Pseudomonadota	c__Betaproteobacteria	o__Burkholderiales	f__Burkholderiaceae	g__Caballeronia	10	0	2	0	0	0	0	0	12
d__Bacteria	k__unclassified_d__Bacteria	p__Pseudomonadota	c__Betaproteobacteria	o__Burkholderiales	f__Burkholderiaceae	g__Cupriavidus	1692	14	426	80	2	0	0	8	2222
d__Bacteria	k__unclassified_d__Bacteria	p__Pseudomonadota	c__Betaproteobacteria	o__Burkholderiales	f__Burkholderiaceae	g__Limnobacter	2	48	662	694	0	212	122	170	1910
d__Bacteria	k__unclassified_d__Bacteria	p__Pseudomonadota	c__Betaproteobacteria	o__Burkholderiales	f__Burkholderiaceae	g__Paraburkholderia	26	6	34	6	2	0	2	2	78
d__Bacteria	k__unclassified_d__Bacteria	p__Pseudomonadota	c__Betaproteobacteria	o__Burkholderiales	f__Burkholderiaceae	g__Paucimonas	8	0	2	0	2	0	0	0	12
d__Bacteria	k__unclassified_d__Bacteria	p__Pseudomonadota	c__Betaproteobacteria	o__Burkholderiales	f__Burkholderiaceae	g__Polynucleobacter	2	0	0	0	8	0	0	0	10
d__Bacteria	k__unclassified_d__Bacteria	p__Pseudomonadota	c__Betaproteobacteria	o__Burkholderiales	f__Burkholderiaceae	g__Ralstonia	306	0	68	20	26	6	0	0	426
d__Bacteria	k__unclassified_d__Bacteria	p__Pseudomonadota	c__Betaproteobacteria	o__Burkholderiales	f__Comamonadaceae	g__Acidovorax	124	76	462	80	18	112	42	14	928
d__Bacteria	k__unclassified_d__Bacteria	p__Pseudomonadota	c__Betaproteobacteria	o__Burkholderiales	f__Comamonadaceae	g__Alicycliphilus	10	28	0	0	0	0	0	2	40
d__Bacteria	k__unclassified_d__Bacteria	p__Pseudomonadota	c__Betaproteobacteria	o__Burkholderiales	f__Comamonadaceae	g__Caenimonas	8	6	14	4	0	0	0	2	34
d__Bacteria	k__unclassified_d__Bacteria	p__Pseudomonadota	c__Betaproteobacteria	o__Burkholderiales	f__Comamonadaceae	g__Comamonas	84	136	8	2	86	504	668	260	1748
d__Bacteria	k__unclassified_d__Bacteria	p__Pseudomonadota	c__Betaproteobacteria	o__Burkholderiales	f__Comamonadaceae	g__Curvibacter	72	224	18	6	216	1154	1382	462	3534
d__Bacteria	k__unclassified_d__Bacteria	p__Pseudomonadota	c__Betaproteobacteria	o__Burkholderiales	f__Comamonadaceae	g__Hydrogenophaga	994	152	2894	1744	102	1016	732	182	7816
d__Bacteria	k__unclassified_d__Bacteria	p__Pseudomonadota	c__Betaproteobacteria	o__Burkholderiales	f__Comamonadaceae	g__Hylemonella	4	0	0	0	30	40	26	32	132
d__Bacteria	k__unclassified_d__Bacteria	p__Pseudomonadota	c__Betaproteobacteria	o__Burkholderiales	f__Comamonadaceae	g__Limnohabitans	4	0	0	0	0	0	0	0	4
d__Bacteria	k__unclassified_d__Bacteria	p__Pseudomonadota	c__Betaproteobacteria	o__Burkholderiales	f__Comamonadaceae	g__Ottowia	40	88	40	22	2	2	0	0	194
d__Bacteria	k__unclassified_d__Bacteria	p__Pseudomonadota	c__Betaproteobacteria	o__Burkholderiales	f__Comamonadaceae	g__Pelomonas	8	30	68	26	20	30	4	10	196
d__Bacteria	k__unclassified_d__Bacteria	p__Pseudomonadota	c__Betaproteobacteria	o__Burkholderiales	f__Comamonadaceae	g__Polaromonas	8	0	18	26	2	10	10	22	96
d__Bacteria	k__unclassified_d__Bacteria	p__Pseudomonadota	c__Betaproteobacteria	o__Burkholderiales	f__Comamonadaceae	g__Pseudacidovorax	0	0	0	0	0	2	8	8	18
d__Bacteria	k__unclassified_d__Bacteria	p__Pseudomonadota	c__Betaproteobacteria	o__Burkholderiales	f__Comamonadaceae	g__Ramlibacter	164	162	780	328	212	472	294	278	2690
d__Bacteria	k__unclassified_d__Bacteria	p__Pseudomonadota	c__Betaproteobacteria	o__Burkholderiales	f__Comamonadaceae	g__Rhodoferax	0	6	0	0	0	0	0	0	6
d__Bacteria	k__unclassified_d__Bacteria	p__Pseudomonadota	c__Betaproteobacteria	o__Burkholderiales	f__Comamonadaceae	g__Simplicispira	114	288	0	0	0	0	0	0	402
d__Bacteria	k__unclassified_d__Bacteria	p__Pseudomonadota	c__Betaproteobacteria	o__Burkholderiales	f__Comamonadaceae	g__Variovorax	10	0	52	26	0	2	2	0	92
d__Bacteria	k__unclassified_d__Bacteria	p__Pseudomonadota	c__Betaproteobacteria	o__Burkholderiales	f__Comamonadaceae	g__Verminephrobacter	0	2	108	0	0	0	0	0	110
d__Bacteria	k__unclassified_d__Bacteria	p__Pseudomonadota	c__Betaproteobacteria	o__Burkholderiales	f__Oxalobacteraceae	g__Herbaspirillum	4	0	30	8	2	4	6	2	56
d__Bacteria	k__unclassified_d__Bacteria	p__Pseudomonadota	c__Betaproteobacteria	o__Burkholderiales	f__Oxalobacteraceae	g__Herminiimonas	8	12	52	6	0	0	0	2	80
d__Bacteria	k__unclassified_d__Bacteria	p__Pseudomonadota	c__Betaproteobacteria	o__Burkholderiales	f__Oxalobacteraceae	g__Lacisediminimonas	10	0	0	2	0	0	10	2	24
d__Bacteria	k__unclassified_d__Bacteria	p__Pseudomonadota	c__Betaproteobacteria	o__Burkholderiales	f__Oxalobacteraceae	g__Massilia	138	396	1212	138	22	180	108	204	2398
d__Bacteria	k__unclassified_d__Bacteria	p__Pseudomonadota	c__Betaproteobacteria	o__Burkholderiales	f__Oxalobacteraceae	g__Noviherbaspirillum	274	44	192	110	42	20	6	24	712
d__Bacteria	k__unclassified_d__Bacteria	p__Pseudomonadota	c__Betaproteobacteria	o__Burkholderiales	f__Oxalobacteraceae	g__Rugamonas	0	26	234	46	0	8	4	4	322
d__Bacteria	k__unclassified_d__Bacteria	p__Pseudomonadota	c__Betaproteobacteria	o__Burkholderiales	f__Oxalobacteraceae	g__Undibacterium	2	0	50	14	0	2	0	0	68
d__Bacteria	k__unclassified_d__Bacteria	p__Pseudomonadota	c__Betaproteobacteria	o__Burkholderiales	f__Sphaerotilaceae	g__Aquincola	8	2	2	0	0	0	0	0	12
d__Bacteria	k__unclassified_d__Bacteria	p__Pseudomonadota	c__Betaproteobacteria	o__Burkholderiales	f__Sphaerotilaceae	g__Azohydromonas	4	10	36	10	0	30	30	12	132
d__Bacteria	k__unclassified_d__Bacteria	p__Pseudomonadota	c__Betaproteobacteria	o__Burkholderiales	f__Sphaerotilaceae	g__Caldimonas	8	28	110	46	0	56	50	20	318
d__Bacteria	k__unclassified_d__Bacteria	p__Pseudomonadota	c__Betaproteobacteria	o__Burkholderiales	f__Sphaerotilaceae	g__Ideonella	4	0	0	0	16	0	0	0	20
d__Bacteria	k__unclassified_d__Bacteria	p__Pseudomonadota	c__Betaproteobacteria	o__Burkholderiales	f__Sphaerotilaceae	g__Methylibium	4	20	14	0	32	20	8	4	102
d__Bacteria	k__unclassified_d__Bacteria	p__Pseudomonadota	c__Betaproteobacteria	o__Burkholderiales	f__Sphaerotilaceae	g__Piscinibacter	16	60	20	12	24	18	14	22	186
d__Bacteria	k__unclassified_d__Bacteria	p__Pseudomonadota	c__Betaproteobacteria	o__Burkholderiales	f__Sphaerotilaceae	g__Rubrivivax	0	20	28	8	0	0	2	0	58
d__Bacteria	k__unclassified_d__Bacteria	p__Pseudomonadota	c__Betaproteobacteria	o__Burkholderiales	f__Sphaerotilaceae	g__Sphaerotilus	120	120	6	0	0	0	0	0	246
d__Bacteria	k__unclassified_d__Bacteria	p__Pseudomonadota	c__Betaproteobacteria	o__Burkholderiales	f__unclassified_o__Burkholderiales	g__Aquabacterium	0	2	12	2	44	24	4	10	98
d__Bacteria	k__unclassified_d__Bacteria	p__Pseudomonadota	c__Betaproteobacteria	o__Burkholderiales	f__unclassified_o__Burkholderiales	g__Rhizobacter	38	28	0	0	18	0	0	4	88
d__Bacteria	k__unclassified_d__Bacteria	p__Pseudomonadota	c__Betaproteobacteria	o__Neisseriales	f__Chitinibacteraceae	g__Chitinimonas	0	0	10	0	0	0	0	0	10
d__Bacteria	k__unclassified_d__Bacteria	p__Pseudomonadota	c__Betaproteobacteria	o__Neisseriales	f__Chitinibacteraceae	g__Deefgea	0	2	10	6	0	0	0	0	18
d__Bacteria	k__unclassified_d__Bacteria	p__Pseudomonadota	c__Betaproteobacteria	o__Neisseriales	f__Chromobacteriaceae	g__Chromobacterium	0	0	4	0	0	0	8	0	12
d__Bacteria	k__unclassified_d__Bacteria	p__Pseudomonadota	c__Betaproteobacteria	o__Neisseriales	f__Neisseriaceae	g__Neisseria	0	0	12	0	0	0	0	2	14
d__Bacteria	k__unclassified_d__Bacteria	p__Pseudomonadota	c__Betaproteobacteria	o__Neisseriales	f__Neisseriaceae	g__Vitreoscilla	0	36	154	12	2	60	30	8	302
d__Bacteria	k__unclassified_d__Bacteria	p__Pseudomonadota	c__Betaproteobacteria	o__Nitrosomonadales	f__Gallionellaceae	g__Candidatus_Nitrotoga	0	0	0	0	56	56	86	210	408
d__Bacteria	k__unclassified_d__Bacteria	p__Pseudomonadota	c__Betaproteobacteria	o__Nitrosomonadales	f__Gallionellaceae	g__Ferrigenium	0	0	0	8	0	0	0	0	8
d__Bacteria	k__unclassified_d__Bacteria	p__Pseudomonadota	c__Betaproteobacteria	o__Nitrosomonadales	f__Gallionellaceae	g__Gallionella	44	44	6	0	0	0	0	0	94
d__Bacteria	k__unclassified_d__Bacteria	p__Pseudomonadota	c__Betaproteobacteria	o__Nitrosomonadales	f__Methylophilaceae	g__Methylobacillus	0	16	50	266	0	108	74	82	596
d__Bacteria	k__unclassified_d__Bacteria	p__Pseudomonadota	c__Betaproteobacteria	o__Nitrosomonadales	f__Methylophilaceae	g__Methylotenera	0	18	2	2	4	16	4	0	46
d__Bacteria	k__unclassified_d__Bacteria	p__Pseudomonadota	c__Betaproteobacteria	o__Nitrosomonadales	f__Nitrosomonadaceae	g__Nitrosomonas	0	0	18	10	0	0	0	12	40
d__Bacteria	k__unclassified_d__Bacteria	p__Pseudomonadota	c__Betaproteobacteria	o__Nitrosomonadales	f__Nitrosomonadaceae	g__Nitrosospira	6	10	308	4	756	90	152	1024	2350
d__Bacteria	k__unclassified_d__Bacteria	p__Pseudomonadota	c__Betaproteobacteria	o__Nitrosomonadales	f__Sterolibacteriaceae	g__Candidatus_Nitricoxidivorans	0	0	2	2	6	22	34	16	82
d__Bacteria	k__unclassified_d__Bacteria	p__Pseudomonadota	c__Betaproteobacteria	o__Nitrosomonadales	f__Sterolibacteriaceae	g__Denitratisoma	34	62	2	0	0	0	0	0	98
d__Bacteria	k__unclassified_d__Bacteria	p__Pseudomonadota	c__Betaproteobacteria	o__Nitrosomonadales	f__Sterolibacteriaceae	g__Methyloversatilis	144	0	0	18	20	14	4	22	222
d__Bacteria	k__unclassified_d__Bacteria	p__Pseudomonadota	c__Betaproteobacteria	o__Nitrosomonadales	f__Sterolibacteriaceae	g__Rugosibacter	0	0	4	68	0	22	66	16	176
d__Bacteria	k__unclassified_d__Bacteria	p__Pseudomonadota	c__Betaproteobacteria	o__Nitrosomonadales	f__Sterolibacteriaceae	g__Sterolibacterium	14	2	2	0	2	310	326	90	746
d__Bacteria	k__unclassified_d__Bacteria	p__Pseudomonadota	c__Betaproteobacteria	o__Nitrosomonadales	f__Sterolibacteriaceae	g__Sulfuricystis	0	0	0	0	0	34	22	6	62
d__Bacteria	k__unclassified_d__Bacteria	p__Pseudomonadota	c__Betaproteobacteria	o__Nitrosomonadales	f__Sterolibacteriaceae	g__Sulfuritalea	8	0	26	8	4	20	0	6	72
d__Bacteria	k__unclassified_d__Bacteria	p__Pseudomonadota	c__Betaproteobacteria	o__Nitrosomonadales	f__Sulfuricellaceae	g__Sulfuricella	0	0	6	2	0	108	110	54	280
d__Bacteria	k__unclassified_d__Bacteria	p__Pseudomonadota	c__Betaproteobacteria	o__Nitrosomonadales	f__Sulfuricellaceae	g__Sulfuriferula	0	0	0	0	2	66	28	10	106
d__Bacteria	k__unclassified_d__Bacteria	p__Pseudomonadota	c__Betaproteobacteria	o__Nitrosomonadales	f__Thiobacillaceae	g__Thiobacillus	76	20	230	168	478	3730	4770	4726	14198
d__Bacteria	k__unclassified_d__Bacteria	p__Pseudomonadota	c__Betaproteobacteria	o__Rhodocyclales	f__Azonexaceae	g__Azonexus	58	134	0	0	0	0	0	0	192
d__Bacteria	k__unclassified_d__Bacteria	p__Pseudomonadota	c__Betaproteobacteria	o__Rhodocyclales	f__Azonexaceae	g__Dechloromonas	344	690	8	0	8	138	56	8	1252
d__Bacteria	k__unclassified_d__Bacteria	p__Pseudomonadota	c__Betaproteobacteria	o__Rhodocyclales	f__Azonexaceae	g__Quatrionicoccus	42	70	0	0	0	0	0	0	112
d__Bacteria	k__unclassified_d__Bacteria	p__Pseudomonadota	c__Betaproteobacteria	o__Rhodocyclales	f__Rhodocyclaceae	g__Aromatoleum	0	2	2	26	78	820	774	284	1986
d__Bacteria	k__unclassified_d__Bacteria	p__Pseudomonadota	c__Betaproteobacteria	o__Rhodocyclales	f__Rhodocyclaceae	g__Azospira	0	6	16	8	0	20	74	2	126
d__Bacteria	k__unclassified_d__Bacteria	p__Pseudomonadota	c__Betaproteobacteria	o__Rhodocyclales	f__Rhodocyclaceae	g__Propionivibrio	0	6	6	12	0	0	0	2	26
d__Bacteria	k__unclassified_d__Bacteria	p__Pseudomonadota	c__Betaproteobacteria	o__Rhodocyclales	f__Zoogloeaceae	g__Azoarcus	0	2	2	6	26	0	0	0	36
d__Bacteria	k__unclassified_d__Bacteria	p__Pseudomonadota	c__Betaproteobacteria	o__Rhodocyclales	f__Zoogloeaceae	g__Parazoarcus	0	0	0	0	2	36	26	8	72
d__Bacteria	k__unclassified_d__Bacteria	p__Pseudomonadota	c__Betaproteobacteria	o__Rhodocyclales	f__Zoogloeaceae	g__Thauera	36	0	0	8	4	2	0	0	50
d__Bacteria	k__unclassified_d__Bacteria	p__Pseudomonadota	c__Betaproteobacteria	o__Rhodocyclales	f__Zoogloeaceae	g__Zoogloea	222	366	2	0	0	4	6	0	600
d__Bacteria	k__unclassified_d__Bacteria	p__Pseudomonadota	c__Betaproteobacteria	o__unclassified_c__Betaproteobacteria	f__Casimicrobiaceae	g__Casimicrobium	70	160	0	0	0	0	0	0	230
d__Bacteria	k__unclassified_d__Bacteria	p__Pseudomonadota	c__Betaproteobacteria	o__unclassified_c__Betaproteobacteria	f__unclassified_c__Betaproteobacteria	g__Candidatus_Accumulibacter	12	42	0	0	0	0	0	0	54
d__Bacteria	k__unclassified_d__Bacteria	p__Pseudomonadota	c__Betaproteobacteria	o__unclassified_c__Betaproteobacteria	f__unclassified_c__Betaproteobacteria	g__Candidatus_Desulfobacillus	0	0	0	0	0	36	16	6	58
d__Bacteria	k__unclassified_d__Bacteria	p__Pseudomonadota	c__Gammaproteobacteria	o__Acidiferrobacterales	f__Acidiferrobacteraceae	g__Sulfurifustis	26	24	56	12	0	38	34	14	204
d__Bacteria	k__unclassified_d__Bacteria	p__Pseudomonadota	c__Gammaproteobacteria	o__Cellvibrionales	f__Cellvibrionaceae	g__Cellvibrio	0	0	24	156	0	0	0	0	180
d__Bacteria	k__unclassified_d__Bacteria	p__Pseudomonadota	c__Gammaproteobacteria	o__Cellvibrionales	f__Cellvibrionaceae	g__Marinimicrobium	0	0	10	110	0	0	0	0	120
d__Bacteria	k__unclassified_d__Bacteria	p__Pseudomonadota	c__Gammaproteobacteria	o__Cellvibrionales	f__Cellvibrionaceae	g__Saccharophagus	0	0	34	436	0	0	0	0	470
d__Bacteria	k__unclassified_d__Bacteria	p__Pseudomonadota	c__Gammaproteobacteria	o__Cellvibrionales	f__Halieaceae	g__Congregibacter	0	0	6	0	0	0	0	0	6
d__Bacteria	k__unclassified_d__Bacteria	p__Pseudomonadota	c__Gammaproteobacteria	o__Cellvibrionales	f__Halieaceae	g__Halioglobus	4	0	0	0	2	2	0	0	8
d__Bacteria	k__unclassified_d__Bacteria	p__Pseudomonadota	c__Gammaproteobacteria	o__Cellvibrionales	f__Spongiibacteraceae	g__Dasania	0	4	30	10	0	14	12	24	94
d__Bacteria	k__unclassified_d__Bacteria	p__Pseudomonadota	c__Gammaproteobacteria	o__Enterobacterales	f__Enterobacteriaceae	g__Klebsiella	0	0	14	0	0	0	0	0	14
d__Bacteria	k__unclassified_d__Bacteria	p__Pseudomonadota	c__Gammaproteobacteria	o__Enterobacterales	f__Enterobacteriaceae	g__Salmonella	4	0	0	0	4	2	0	0	10
d__Bacteria	k__unclassified_d__Bacteria	p__Pseudomonadota	c__Gammaproteobacteria	o__Immundisolibacterales	f__Immundisolibacteraceae	g__Immundisolibacter	0	10	42	44	18	38	16	46	214
d__Bacteria	k__unclassified_d__Bacteria	p__Pseudomonadota	c__Gammaproteobacteria	o__Legionellales	f__Legionellaceae	g__Legionella	0	0	0	0	4	0	2	2	8
d__Bacteria	k__unclassified_d__Bacteria	p__Pseudomonadota	c__Gammaproteobacteria	o__Methylococcales	f__Methylococcaceae	g__Methylobacter	2	6	20	52	2	20	20	8	130
d__Bacteria	k__unclassified_d__Bacteria	p__Pseudomonadota	c__Gammaproteobacteria	o__Methylococcales	f__Methylococcaceae	g__Methylococcus	14	0	14	0	6	28	32	14	108
d__Bacteria	k__unclassified_d__Bacteria	p__Pseudomonadota	c__Gammaproteobacteria	o__Methylococcales	f__Methylococcaceae	g__Methyloglobulus	4	52	0	0	0	0	0	0	56
d__Bacteria	k__unclassified_d__Bacteria	p__Pseudomonadota	c__Gammaproteobacteria	o__Methylococcales	f__Methylothermaceae	g__Methylohalobius	0	4	2	6	2	6	6	28	54
d__Bacteria	k__unclassified_d__Bacteria	p__Pseudomonadota	c__Gammaproteobacteria	o__Moraxellales	f__Moraxellaceae	g__Acinetobacter	2	4	4	2	0	1472	1062	140	2686
d__Bacteria	k__unclassified_d__Bacteria	p__Pseudomonadota	c__Gammaproteobacteria	o__Moraxellales	f__Moraxellaceae	g__Agitococcus	8	2	0	0	0	64	46	8	128
d__Bacteria	k__unclassified_d__Bacteria	p__Pseudomonadota	c__Gammaproteobacteria	o__Moraxellales	f__Moraxellaceae	g__Fluviicoccus	20	4	8	0	4	286	230	32	584
d__Bacteria	k__unclassified_d__Bacteria	p__Pseudomonadota	c__Gammaproteobacteria	o__Nevskiales	f__Nevskiaceae	g__Nevskia	0	0	0	0	0	0	0	10	10
d__Bacteria	k__unclassified_d__Bacteria	p__Pseudomonadota	c__Gammaproteobacteria	o__Nevskiales	f__Nevskiaceae	g__Panacagrimonas	0	0	0	0	0	6	0	40	46
d__Bacteria	k__unclassified_d__Bacteria	p__Pseudomonadota	c__Gammaproteobacteria	o__Nevskiales	f__Nevskiaceae	g__Sinimarinibacterium	0	4	14	0	0	0	0	2	20
d__Bacteria	k__unclassified_d__Bacteria	p__Pseudomonadota	c__Gammaproteobacteria	o__Oceanospirillales	f__Alcanivoracaceae	g__Alcanivorax	0	0	8	12	4	4	2	22	52
d__Bacteria	k__unclassified_d__Bacteria	p__Pseudomonadota	c__Gammaproteobacteria	o__Oceanospirillales	f__Alcanivoracaceae	g__Ketobacter	0	2	22	254	0	2	16	0	296
d__Bacteria	k__unclassified_d__Bacteria	p__Pseudomonadota	c__Gammaproteobacteria	o__Oceanospirillales	f__Balneatrichaceae	g__Pokkaliibacter	0	4	28	14	0	6	26	28	106
d__Bacteria	k__unclassified_d__Bacteria	p__Pseudomonadota	c__Gammaproteobacteria	o__Oceanospirillales	f__Oceanospirillaceae	g__Marinobacterium	0	0	2	0	6	72	34	52	166
d__Bacteria	k__unclassified_d__Bacteria	p__Pseudomonadota	c__Gammaproteobacteria	o__Pseudomonadales	f__Marinobacteraceae	g__Marinobacter	0	2	8	2	0	6	0	8	26
d__Bacteria	k__unclassified_d__Bacteria	p__Pseudomonadota	c__Gammaproteobacteria	o__Pseudomonadales	f__Perlucidibacaceae	g__Perlucidibaca	8	16	6	8	2	172	112	26	350
d__Bacteria	k__unclassified_d__Bacteria	p__Pseudomonadota	c__Gammaproteobacteria	o__Pseudomonadales	f__Pseudomonadaceae	g__Azotobacter	0	0	0	0	0	80	112	6	198
d__Bacteria	k__unclassified_d__Bacteria	p__Pseudomonadota	c__Gammaproteobacteria	o__Pseudomonadales	f__Pseudomonadaceae	g__Pseudomonas	368	316	1986	1076	434	1600	1058	1130	7968
d__Bacteria	k__unclassified_d__Bacteria	p__Pseudomonadota	c__Gammaproteobacteria	o__Pseudomonadales	f__Pseudomonadaceae	g__Stutzerimonas	2	26	314	60	0	136	48	38	624
d__Bacteria	k__unclassified_d__Bacteria	p__Pseudomonadota	c__Gammaproteobacteria	o__Thiotrichales	f__Piscirickettsiaceae	g__Cycloclasticus	0	0	6	6	0	10	2	14	38
d__Bacteria	k__unclassified_d__Bacteria	p__Pseudomonadota	c__Gammaproteobacteria	o__Thiotrichales	f__Piscirickettsiaceae	g__Methylophaga	0	0	0	0	0	8	10	0	18
d__Bacteria	k__unclassified_d__Bacteria	p__Pseudomonadota	c__Gammaproteobacteria	o__Xanthomonadales	f__Rhodanobacteraceae	g__Dokdonella	2	4	8	2	0	72	64	14	166
d__Bacteria	k__unclassified_d__Bacteria	p__Pseudomonadota	c__Gammaproteobacteria	o__Xanthomonadales	f__Rhodanobacteraceae	g__Dyella	0	0	0	14	92	0	0	0	106
d__Bacteria	k__unclassified_d__Bacteria	p__Pseudomonadota	c__Gammaproteobacteria	o__Xanthomonadales	f__Rhodanobacteraceae	g__Oleiagrimonas	10	0	8	4	6	4	4	6	42
d__Bacteria	k__unclassified_d__Bacteria	p__Pseudomonadota	c__Gammaproteobacteria	o__Xanthomonadales	f__Rhodanobacteraceae	g__Rhodanobacter	316	376	24	2	2	0	0	0	720
d__Bacteria	k__unclassified_d__Bacteria	p__Pseudomonadota	c__Gammaproteobacteria	o__Xanthomonadales	f__Rhodanobacteraceae	g__Tahibacter	0	0	2	0	0	42	42	66	152
d__Bacteria	k__unclassified_d__Bacteria	p__Pseudomonadota	c__Gammaproteobacteria	o__Xanthomonadales	f__Xanthomonadaceae	g__Luteimonas	2	24	194	64	0	16	14	2	316
d__Bacteria	k__unclassified_d__Bacteria	p__Pseudomonadota	c__Gammaproteobacteria	o__Xanthomonadales	f__Xanthomonadaceae	g__Lysobacter	10	1116	500	150	14	46	12	22	1870
d__Bacteria	k__unclassified_d__Bacteria	p__Pseudomonadota	c__Gammaproteobacteria	o__Xanthomonadales	f__Xanthomonadaceae	g__Pseudoxanthomonas	22	30	66	100	0	12	0	0	230
d__Bacteria	k__unclassified_d__Bacteria	p__Pseudomonadota	c__Gammaproteobacteria	o__Xanthomonadales	f__Xanthomonadaceae	g__Stenotrophomonas	6	4	2	12	0	0	0	0	24
d__Bacteria	k__unclassified_d__Bacteria	p__Pseudomonadota	c__Gammaproteobacteria	o__Xanthomonadales	f__Xanthomonadaceae	g__Xanthomonas	0	4	0	6	0	0	0	0	10
d__Bacteria	k__unclassified_d__Bacteria	p__Pseudomonadota	c__Gammaproteobacteria	o__unclassified_c__Gammaproteobacteria	f__unclassified_c__Gammaproteobacteria	g__unclassified_c__Gammaproteobacteria	0	2	12	28	0	20	10	18	90
d__Bacteria	k__unclassified_d__Bacteria	p__Spirochaetota	c__Spirochaetia	o__Leptospirales	f__Leptospiraceae	g__Leptospira	0	0	0	10	0	0	0	0	10
d__Bacteria	k__unclassified_d__Bacteria	p__Spirochaetota	c__Spirochaetia	o__Spirochaetales	f__Treponemataceae	g__Treponema	0	0	0	0	6	108	82	46	242
d__Bacteria	k__unclassified_d__Bacteria	p__Thermodesulfobacteriota	c__Desulfarculia	o__Desulfarculales	f__Desulfarculaceae	g__Desulfarculus	0	0	0	0	0	10	2	4	16
d__Bacteria	k__unclassified_d__Bacteria	p__Thermodesulfobacteriota	c__Desulfobulbia	o__Desulfobulbales	f__Desulfobulbaceae	g__Desulfobulbus	0	0	0	78	0	2	22	0	102
d__Bacteria	k__unclassified_d__Bacteria	p__Thermodesulfobacteriota	c__Desulfuromonadia	o__Geobacterales	f__Geobacteraceae	g__Geoanaerobacter	0	0	0	0	4	0	10	26	40
d__Bacteria	k__unclassified_d__Bacteria	p__Thermodesulfobacteriota	c__Desulfuromonadia	o__Geobacterales	f__Geobacteraceae	g__Geobacter	176	0	306	168	164	202	276	294	1586
d__Bacteria	k__unclassified_d__Bacteria	p__Thermodesulfobacteriota	c__Desulfuromonadia	o__Geobacterales	f__Geobacteraceae	g__Geomobilimonas	0	0	8	0	194	182	148	302	834
d__Bacteria	k__unclassified_d__Bacteria	p__Thermodesulfobacteriota	c__Desulfuromonadia	o__Geobacterales	f__Geobacteraceae	g__Pelotalea	0	0	0	0	2	2	2	14	20
d__Bacteria	k__unclassified_d__Bacteria	p__Thermodesulfobacteriota	c__Syntrophia	o__Syntrophales	f__Smithellaceae	g__Smithella	0	0	0	0	0	22	26	2	50
d__Bacteria	k__unclassified_d__Bacteria	p__Thermodesulfobacteriota	c__Syntrophobacteria	o__Syntrophobacterales	f__Syntrophobacteraceae	g__Desulforhabdus	0	0	0	2	0	6	12	10	30
d__Bacteria	k__unclassified_d__Bacteria	p__Thermomicrobiota	c__Thermomicrobia	o__Sphaerobacterales	f__Sphaerobacteraceae	g__Nitrolancea	4	4	22	34	0	2	2	4	72
d__Bacteria	k__unclassified_d__Bacteria	p__Thermomicrobiota	c__Thermomicrobia	o__Sphaerobacterales	f__Sphaerobacteraceae	g__Sphaerobacter	2	0	8	10	0	0	0	2	22
d__Bacteria	k__unclassified_d__Bacteria	p__Thermomicrobiota	c__Thermomicrobia	o__Thermomicrobiales	f__Thermomicrobiaceae	g__Thermomicrobium	0	0	16	10	0	0	0	0	26
d__Bacteria	k__unclassified_d__Bacteria	p__Verrucomicrobiota	c__Opitutae	o__Opitutales	f__Opitutaceae	g__Lacunisphaera	2	0	0	0	56	2	6	0	66
d__Bacteria	k__unclassified_d__Bacteria	p__Verrucomicrobiota	c__Opitutae	o__Opitutales	f__Opitutaceae	g__Oleiharenicola	6	16	8	4	0	0	0	0	34
d__Bacteria	k__unclassified_d__Bacteria	p__Verrucomicrobiota	c__Opitutae	o__Opitutales	f__Opitutaceae	g__Opitutus	134	0	216	90	52	12	8	12	524
d__Bacteria	k__unclassified_d__Bacteria	p__Verrucomicrobiota	c__Opitutae	o__Opitutales	f__Opitutaceae	g__Rariglobus	0	0	10	12	0	0	0	0	22
d__Bacteria	k__unclassified_d__Bacteria	p__Verrucomicrobiota	c__Opitutae	o__Puniceicoccales	f__Cerasicoccaceae	g__Cerasicoccus	6	4	0	0	0	0	0	0	10
d__Bacteria	k__unclassified_d__Bacteria	p__Verrucomicrobiota	c__Opitutae	o__Puniceicoccales	f__Oceanipulchritudinaceae	g__Oceanipulchritudo	0	0	0	0	2	0	0	2	4
d__Bacteria	k__unclassified_d__Bacteria	p__Verrucomicrobiota	c__Verrucomicrobiae	o__Limisphaerales	f__Fontisphaeraceae	g__Fontisphaera	0	0	0	0	0	8	4	0	12
d__Bacteria	k__unclassified_d__Bacteria	p__Verrucomicrobiota	c__Verrucomicrobiae	o__Limisphaerales	f__unclassified_o__Limisphaerales	g__Pedosphaera	0	0	14	4	26	0	0	0	44
d__Bacteria	k__unclassified_d__Bacteria	p__Verrucomicrobiota	c__Verrucomicrobiae	o__Verrucomicrobiales	f__Verrucomicrobiaceae	g__Prosthecobacter	28	102	0	0	0	0	0	0	130
d__Bacteria	k__unclassified_d__Bacteria	p__candidate_division_NC10	c__unclassified_p__candidate_division_NC10	o__unclassified_p__candidate_division_NC10	f__unclassified_p__candidate_division_NC10	g__Candidatus_Methylomirabilis	0	0	0	22	0	0	0	0	22
d__Bacteria	k__unclassified_d__Bacteria	p__unclassified_d__Bacteria	c__Deltaproteobacteria	o__Bradymonadales	f__Bradymonadaceae	g__Bradymonas	0	0	2	0	0	0	0	0	2
d__Bacteria	k__unclassified_d__Bacteria	p__unclassified_d__Bacteria	c__Deltaproteobacteria	o__Bradymonadales	f__Bradymonadaceae	g__Persicimonas	0	0	0	0	0	0	6	2	8
d__Bacteria	k__unclassified_d__Bacteria	p__unclassified_d__Bacteria	c__Deltaproteobacteria	o__Bradymonadales	f__Microvenatoraceae	g__Microvenator	0	2	8	28	0	2	2	4	46
d__Eukaryota	k__Fungi	p__Ascomycota	c__Geoglossomycetes	o__Geoglossales	f__Geoglossaceae	g__Geoglossum	0	0	0	0	0	2	8	2	12
d__Eukaryota	k__unclassified_d__Eukaryota	p__unclassified_d__Eukaryota	c__Bolidophyceae	o__Parmales	f__unclassified_o__Parmales	g__unclassified_o__Parmales	0	0	0	0	0	0	8	0	8
d__Eukaryota	k__unclassified_d__Eukaryota	p__unclassified_d__Eukaryota	c__unclassified_d__Eukaryota	o__Jakobida	f__Andaluciidae	g__Andalucia	0	0	0	0	0	0	2	0	2
